# Supplementary material for: Multiscale modelling of biomolecular corona formation on metallic surfaces
Source: publisher site journal article supplement (doi:10.3762/bjnano.15.21), 2024-02-13
Supplement: Additional file 1 [file 2190-4286-15-21-S1.pdf]

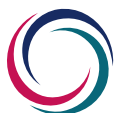

## Supporting Information

for

### **Multiscale modelling of biomolecular corona formation on metallic surfaces**

Parinaz Mosaddeghi Amini, Ian Rouse, Julia Subbotina and Vladimir Lobaskin

*Beilstein J. Nanotechnol.* **2024**, *15*, 215–229. [doi:10.3762/bjnano.15.21](https://doi.org/10.3762/bjnano.15.21)

## Supporting material

# Contents

|     |                                                                      |     |
|-----|----------------------------------------------------------------------|-----|
| 1   | Adsorption Free Energies for each SCAs on Al surfaces                | S3  |
| 2   | Water density profiles for Aluminium slabs                           | S4  |
| 3   | Influence of the NP size on the protein adsorption energies          | S5  |
| 4   | Milk molecules ranking based on mass abundance in the corona         | S6  |
| 5   | Example of Al NP size-dependent interaction of $\alpha$ -lactalbumin | S7  |
| 6   | Comparison of interaction of proteins with different Al fcc surfaces | S8  |
| 6.1 | $\alpha$ s1-casein . . . . .                                         | S8  |
| 6.2 | $\alpha$ s2-casein . . . . .                                         | S9  |
| 6.3 | $\beta$ - casein . . . . .                                           | S10 |
| 6.4 | $\alpha$ -lactalbumin . . . . .                                      | S11 |
| 6.5 | $\beta$ -lactoglobulin . . . . .                                     | S12 |
| 6.6 | Bovine Serum Albumin . . . . .                                       | S13 |

# 1 Adsorption Free Energies for each SCAs on Al surfaces

Table S 1. Adsorption Free Energies (in  $k_B T$ ) for Side Chain Analogues (SCA) on the Al(100-110-111) Surfaces from Adaptive Well-Tempered Metadynamics (AWT-MetaD) simulations

| SCA | Class <sup>a</sup> | % <sup>b</sup> | T-group <sup>c</sup> | Charge | $E_{min}$ Al-100 | $E_{min}$ Al-110 | $E_{min}$ Al-111 |
|-----|--------------------|----------------|----------------------|--------|------------------|------------------|------------------|
| ALA | H                  | 7.5            | CH <sub>3</sub>      | 0      | -2.30            | -1.76            | -3.33            |
| ARG | C <sup>+</sup>     | 5.2            | NH <sub>2</sub>      | +1     | -41.46           | -56.26           | -55.76           |
| ASP | C <sup>-</sup>     | 5.2            | O                    | -1     | -9.34            | -20.90           | -25.57           |
| ASN | P                  | 4.6            | NH <sub>2</sub>      | 0      | -19.06           | -29.89           | -31.52           |
| CYS | P                  | 1.8            | CH                   | 0      | -5.44            | -15.24           | -12.77           |
| GAN | P                  | 6.3            | COOH                 | 0      | -30.58           | -30.95           | -38.62           |
| GLN | P                  | 4.1            | NH <sub>2</sub>      | 0      | -25.01           | -30.31           | -33.93           |
| GLU | C <sup>-</sup>     | 6.3            | O                    | -1     | -12.44           | -27.08           | -23.59           |
| GLY | P                  | 7.1            | CH <sub>2</sub>      | 0      | -25.91           | -37.84           | -37.88           |
| HIS | A                  | 2.2            | NH                   | 0      | -19.88           | -37.26           | -45.64           |
| HIE | A                  | 2.2            | NH                   | 0      | -26.15           | -32.76           | -43.86           |
| ILE | H                  | 5.5            | CH <sub>3</sub>      | 0      | -2.52            | -32.84           | -22.78           |
| LEU | H                  | 9.1            | CH <sub>3</sub>      | 0      | -16.79           | -22.59           | -5.21            |
| LYS | C <sup>+</sup>     | 5.8            | NH <sub>2</sub>      | +1     | -17.64           | -30.60           | -28.54           |
| MET | H                  | 2.8            | NH <sub>2</sub>      | 0      | -13.38           | -28.72           | -24.81           |
| PHE | A                  | 3.9            | CH                   | 0      | -20.58           | -26.02           | -42.45           |
| PRO | P                  | 5.1            | CH <sub>2</sub>      | 0      | -51.68           | -50.13           | -55.38           |
| SER | P                  | 7.4            | OH                   | 0      | -6.93            | -19.52           | -12.65           |
| THR | P                  | 6.0            | OH                   | 0      | -5.21            | -19.51           | -12.65           |
| TRP | A                  | 1.3            | NH                   | 0      | -47.44           | -45.23           | -63.32           |
| TYR | A                  | 3.3            | OH                   | 0      | -22.43           | -34.29           | -56.94           |
| VAL | H                  | 6.5            | CH <sub>3</sub>      | 0      | -2.83            | -17.50           | -13.41           |

<sup>a</sup> H = hydrophobic, P = polar, A = aromatic, and C = charged., <sup>b</sup>the percentage of AAs composition in proteins ([1]), <sup>c</sup> Terminating group in SCA.

## 2 Water density profiles for Aluminium slabs

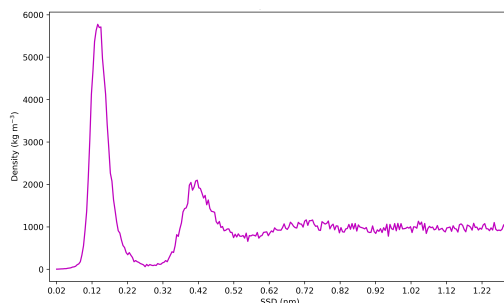

(a) Al-100

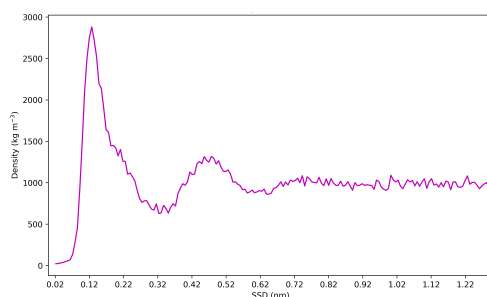

(b) Al-110

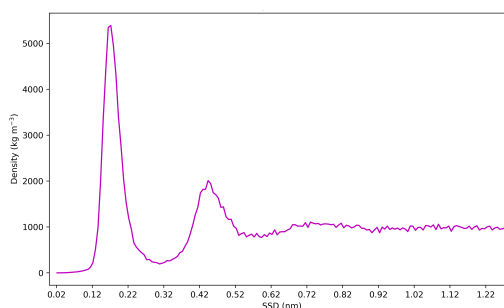

(c) Al-111

Figure S 1. Water density profile obtained from MD simulation for (a) Al-100, (b) Al-110 and (c) Al-111. The profiles exhibit distinct peaks indicating the presence of water layers near the surface. The first peak, observed at approximately 0.15-0.18 nm, corresponds to the formation of the first water layer adjacent to the aluminum surface. The second peak, occurring around 0.42-0.48 nm, represents the presence of a second water layer.

### 3 Influence of the NP size on the protein adsorption energies

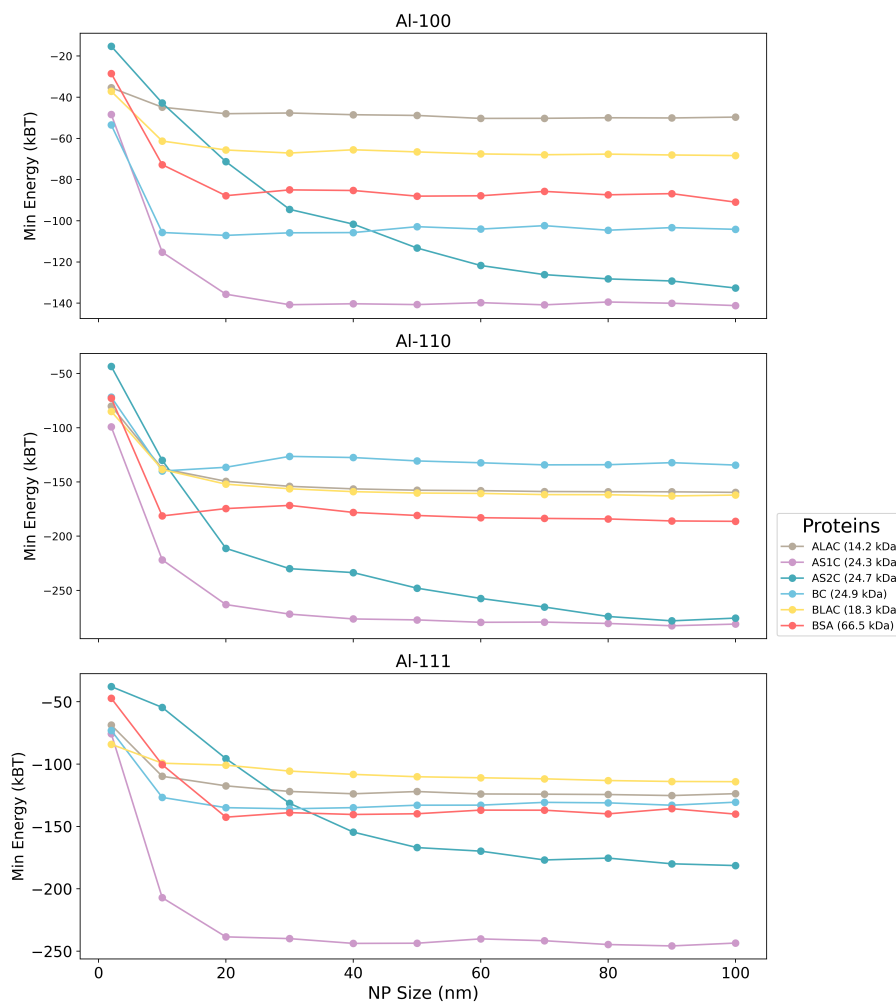

Figure S 2. Energy of adsorption ( $k_B T$ ) as a function of NP size ( $R$ , nm) for six selected milk proteins on Al-100, Al-110, and Al-111 obtained from United Atom model.

## 4 Milk molecules ranking based on mass abundance in the corona

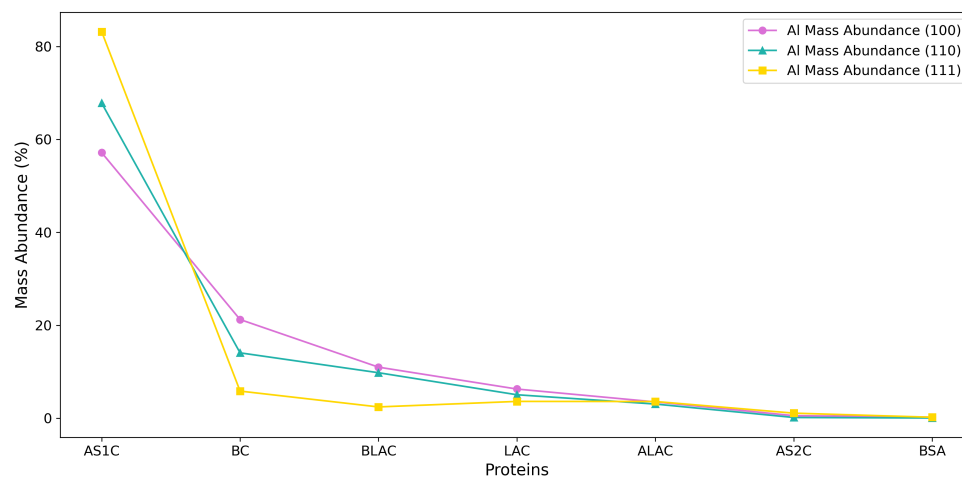

Figure S 3. Protein and lactose mass abundance in the corona on Al surfaces as obtained using the KMC model with molecular displacements, with lactose emerging as the fourth most prevalent compound. The lines are guides to the eye.

## 5 Example of Al NP size-dependent interaction of $\alpha$ -lactalbumin

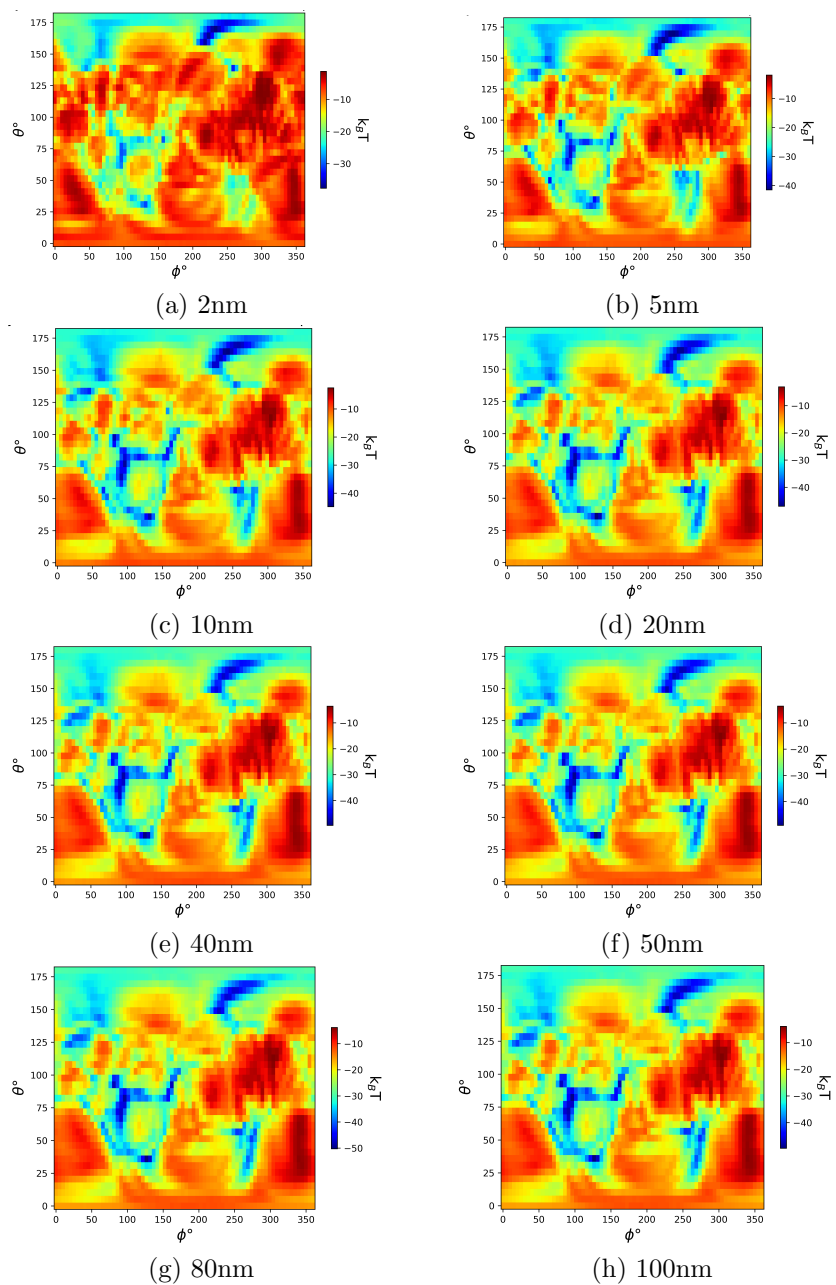

Figure S 4. The heatmap evolution based on Al NP of radius 100 nm for  $\alpha$ -lactalbumin obtained from United Atom model.

## 6 Comparison of interaction of proteins with different Al fcc surfaces

### 6.1 $\alpha$ s1-casein

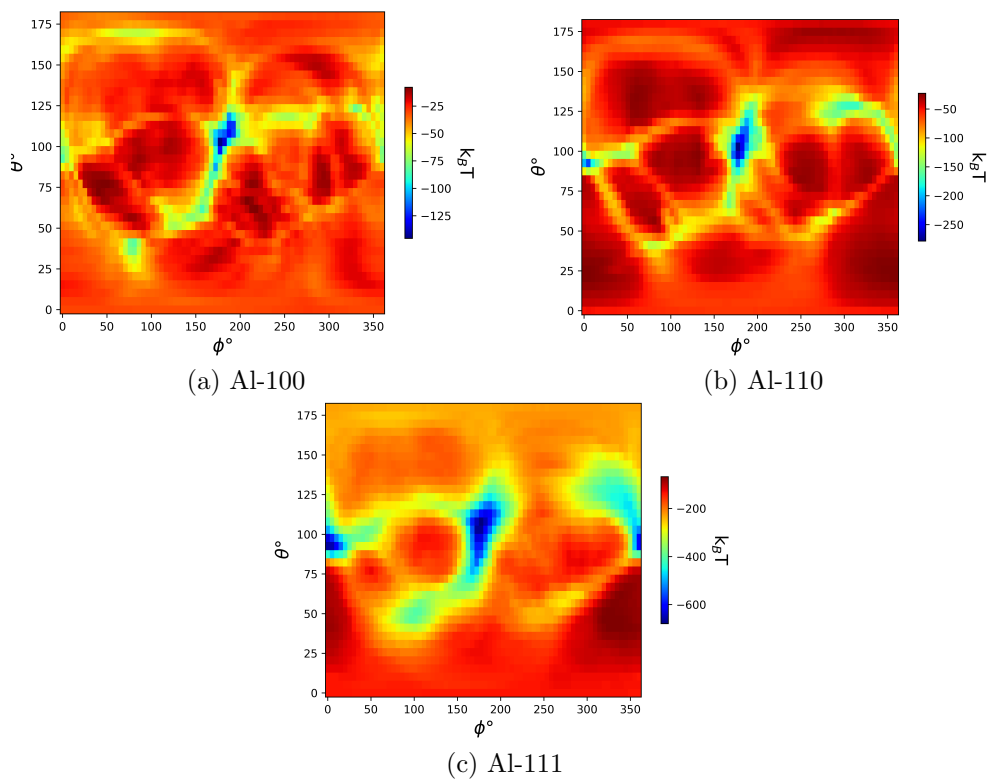

Figure S 5. Adsorption energy heatmaps for  $\alpha$ s1-casein on (a) Al-100, (b) Al-110, (c) Al-111 with NP of radius 30 nm obtained from United Atom model



## 6.2 $\alpha$ 2-casein

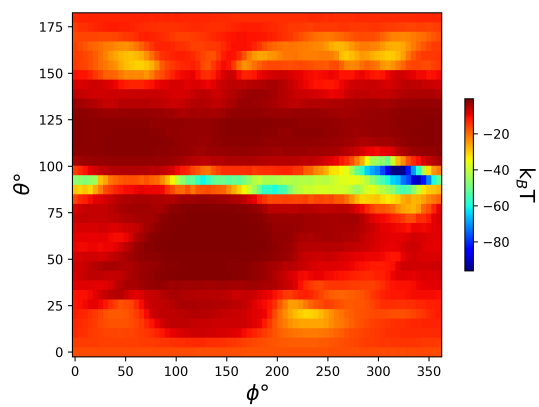

(a) Al-100

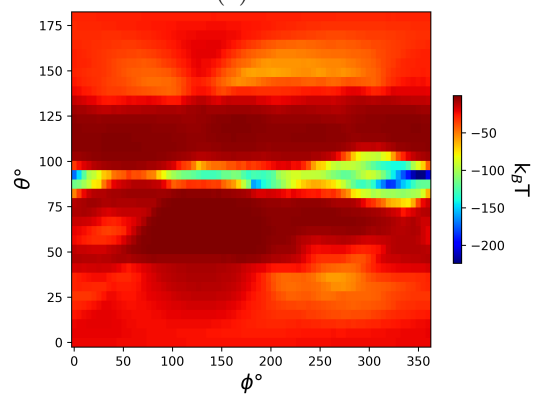

(b) Al-110

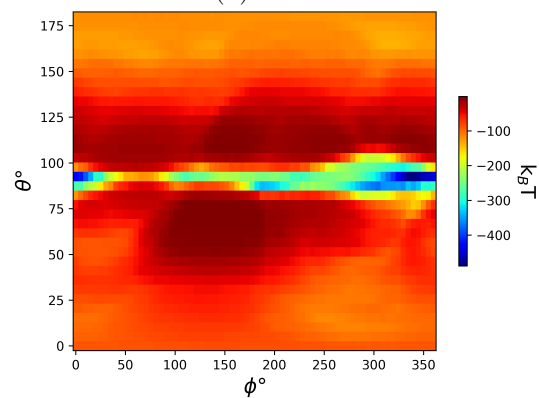

(c) Al-111

Figure S 6. Adsorption energy heatmaps for  $\alpha$ 2-casein on (a) Al-100, (b) Al-110, (c) Al-111 with NP of radius 30 nm obtained from United Atom model

### 6.3 $\beta$ - casein

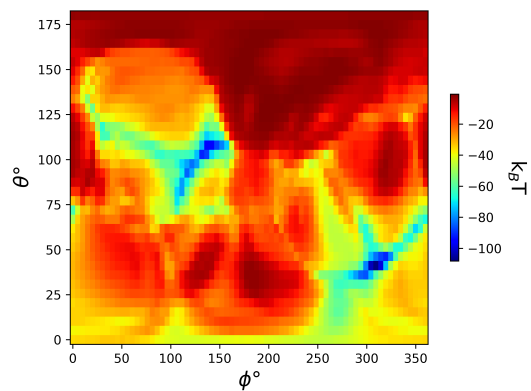

(a) Al-100

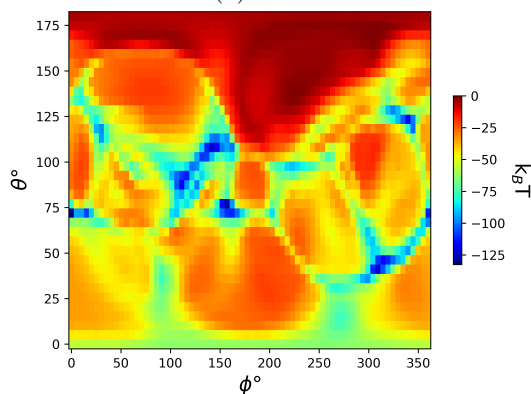

(b) Al-110

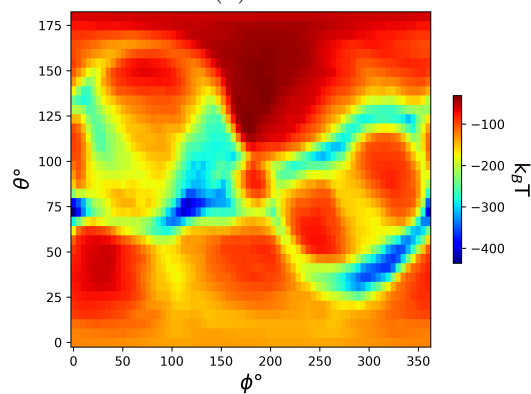

(c) Al-111

Figure S 7. Adsorption energy heatmaps for  $\beta$ -casein on (a) Al-100, (b) Al-110, (c) Al-111 with NP of radius 30 nm obtained from United Atom model

## 6.4 $\alpha$ -lactalbumin

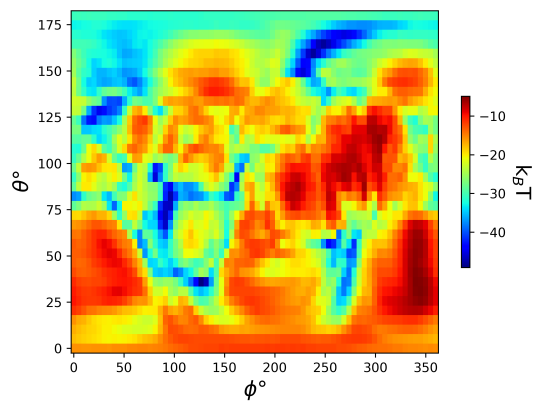

(a) Al-100

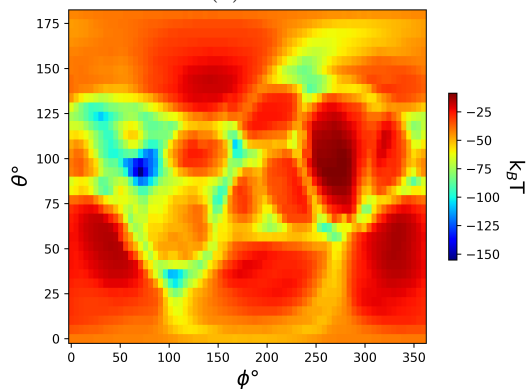

(b) Al-110

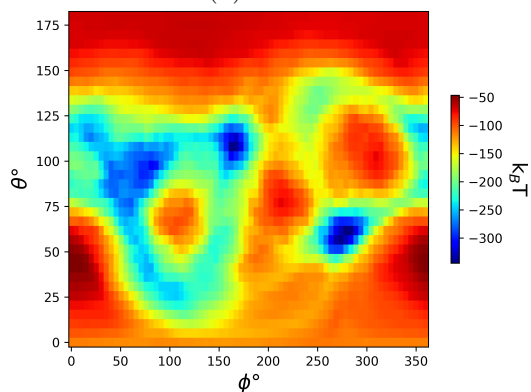

(c) Al-111

Figure S 8. Adsorption energy heatmaps for  $\alpha$ -lactalbumin on (a) Al-100, (b) Al-110, (c) Al-111 with NP of radius 30 nm obtained from United Atom model

## 6.5 $\beta$ -lactoglobulin

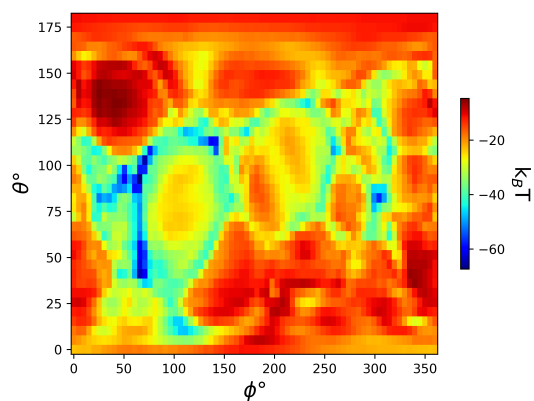

(a) Al-100

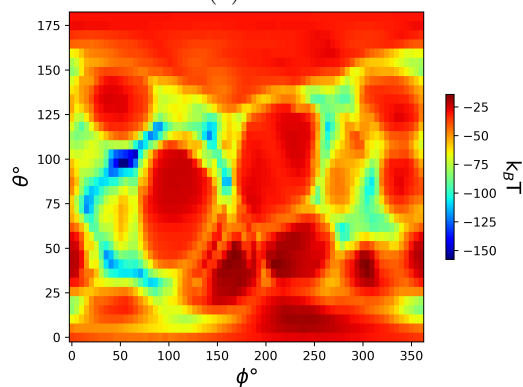

(b) Al-110

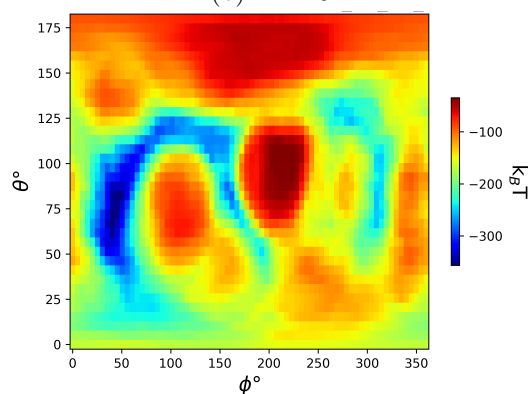

(c) Al-111

Figure S 9. Adsorption energy heatmaps for  $\beta$ -lactoglobulin on (a) Al-100, (b) Al-110, (c) Al-111 with NP of radius 30 nm obtained from United Atom model

## 6.6 Bovine Serum Albumin

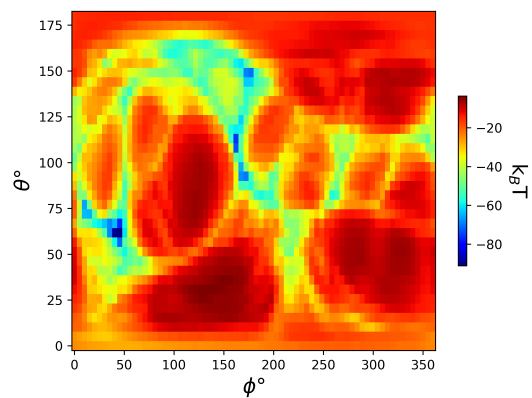

(a) Al-100

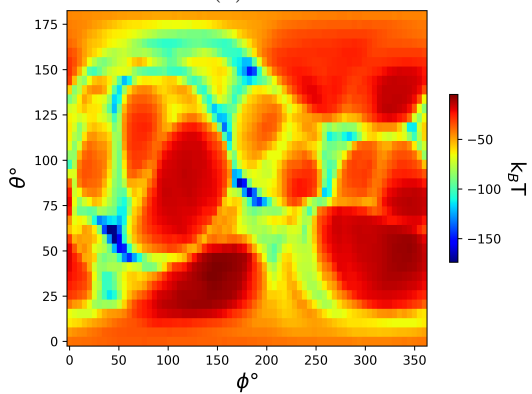

(b) Al-110

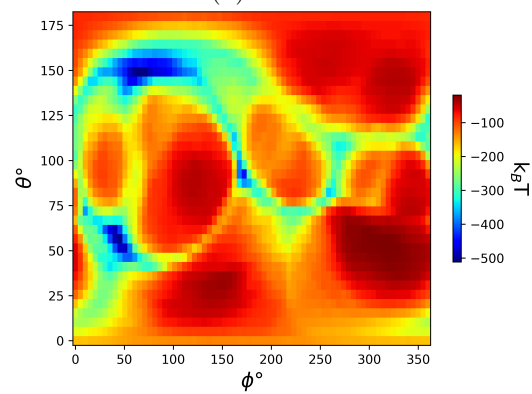

(c) Al-111

Figure S 10. Adsorption energy heatmaps for Bovine Serum Albumin on (a) Al-100, (b) Al-110, (c) Al-111 with NP of radius 30 nm obtained from United Atom model

## References

- [1] Georges Trinquier and Yves-Henri Sanejouand. “Which effective property of amino acids is best preserved by the genetic code?” In: *Protein engineering* 11.3 (1998), pp. 153–169.
