# Supplementary material for: Multiscale modelling of biomolecular corona formation on metallic surfaces
Source: publisher site journal article supplement (doi:10.3762/bjnano.15.21), 2024-02-13
Supplement: Additional file 2 [file 2190-4286-15-21-S2.pdf]

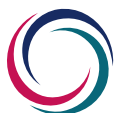

## Supporting Information

for

### **Multiscale modelling of biomolecular corona formation on metallic surfaces**

Parinaz Mosaddeghi Amini, Ian Rouse, Julia Subbotina and Vladimir Lobaskin

*Beilstein J. Nanotechnol.* **2024**, *15*, 215–229. [doi:10.3762/bjnano.15.21](https://doi.org/10.3762/bjnano.15.21)

### **820-Milk-protein-table**

Table S2: Description of 820 milk proteins interaction with AI (100, 110, 111) based on the lowest energy values of the adsorption heatmaps.

| Milk Protein ID | AI-100 |       |                 |               | AI-110 |       |                 |               | AI-111 |       |                 |               |
|-----------------|--------|-------|-----------------|---------------|--------|-------|-----------------|---------------|--------|-------|-----------------|---------------|
|                 | phi    | theta | min-energy (KT) | min-dist (nm) | phi    | theta | min-energy (KT) | min-dist (nm) | phi    | theta | min-energy (KT) | min-dist (nm) |
| Q148H8          | 35     | 125   | -89.89          | 0.12          | 215    | 145   | -173.05         | 0.24          | 0      | 110   | -192.54         | 0.08          |
| Q9XSG3          | 85     | 65    | -88.68          | 0.10          | 270    | 45    | -249.33         | 0.26          | 260    | 150   | -208.62         | 0.05          |
| E1BEV7          | 215    | 115   | -129.33         | 0.14          | 65     | 60    | -259.86         | 0.20          | 35     | 125   | -158.29         | 0.16          |
| F2Z4F5          | 255    | 55    | -115.52         | 0.12          | 255    | 55    | -235.16         | 0.22          | 40     | 85    | -202.56         | 0.16          |
| P33097          | 160    | 135   | -102.95         | 0.18          | 155    | 135   | -227.71         | 0.28          | 295    | 170   | -153.25         | 0.09          |
| A7YWG4          | 120    | 65    | -90.80          | 0.17          | 120    | 65    | -168.36         | 0.27          | 155    | 65    | -166.96         | 0.07          |
| F1MGS9          | 265    | 130   | -95.98          | 0.02          | 265    | 135   | -200.10         | 0.11          | 210    | 95    | -186.36         | 0.15          |
| E1B991          | 355    | 145   | -116.24         | 0.03          | 355    | 145   | -339.78         | 0.06          | 345    | 40    | -182.70         | 0.11          |
| Q2HJ81          | 210    | 90    | -102.30         | 0.19          | 210    | 95    | -198.42         | 0.35          | 325    | 100   | -129.17         | 0.19          |
| A3KN30          | 350    | 65    | -108.65         | 0.15          | 345    | 35    | -212.13         | 0.21          | 20     | 65    | -151.41         | 0.04          |
| A1A4K3          | 185    | 40    | -85.07          | 0.19          | 130    | 140   | -211.19         | 0.15          | 220    | 95    | -145.38         | 0.17          |
| P00735          | 270    | 55    | -130.95         | 0.12          | 275    | 55    | -226.39         | 0.15          | 270    | 55    | -186.16         | 0.11          |
| P31098          | 205    | 90    | -73.06          | 0.17          | 345    | 60    | -180.24         | 0.23          | 205    | 50    | -120.86         | 0.16          |
| O62830          | 215    | 100   | -86.58          | 0.18          | 250    | 45    | -183.90         | 0.08          | 185    | 45    | -155.49         | 0.16          |
| E1B898          | 15     | 60    | -105.08         | 0.10          | 25     | 75    | -260.09         | 0.12          | 65     | 60    | -183.40         | 0.11          |
| A6QPZ4          | 110    | 125   | -88.21          | 0.17          | 35     | 120   | -175.14         | 0.25          | 275    | 45    | -159.12         | 0.09          |
| Q3ZBZ8          | 40     | 105   | -136.90         | 0.13          | 40     | 85    | -214.45         | 0.33          | 40     | 120   | -139.22         | 0.11          |
| G3X7D2          | 105    | 85    | -109.01         | 0.20          | 155    | 70    | -246.83         | 0.22          | 270    | 135   | -147.40         | 0.05          |
| Q58DL9          | 300    | 170   | -113.26         | 0.05          | 295    | 160   | -215.18         | 0.04          | 115    | 60    | -140.07         | 0.17          |
| G3N0V2          | 195    | 135   | -103.69         | 0.05          | 205    | 145   | -286.06         | 0.09          | 355    | 145   | -209.49         | 0.04          |
| Q0VCN9          | 0      | 115   | -105.69         | 0.21          | 0      | 115   | -227.73         | 0.30          | 255    | 55    | -184.69         | 0.09          |
| Q9MZ06          | 160    | 100   | -86.78          | 0.21          | 285    | 75    | -173.85         | 0.23          | 155    | 135   | -165.45         | 0.16          |
| F1MC11          | 195    | 55    | -95.84          | 0.17          | 0      | 100   | -219.92         | 0.09          | 20     | 55    | -151.81         | 0.03          |
| E1BJL8          | 35     | 85    | -101.65         | 0.19          | 215    | 75    | -210.31         | 0.27          | 145    | 170   | -109.33         | 0.17          |
| Q09TE3          | 140    | 40    | -112.33         | 0.19          | 145    | 105   | -246.16         | 0.14          | 340    | 55    | -162.46         | 0.16          |
| E1B8A0          | 5      | 60    | -106.72         | 0.20          | 345    | 145   | -206.72         | 0.21          | 245    | 65    | -94.33          | 0.09          |
| E1BEC6          | 75     | 145   | -63.53          | 0.01          | 215    | 45    | -159.61         | 0.11          | 170    | 115   | -220.79         | 0.12          |
| P23805          | 65     | 55    | -95.16          | 0.19          | 140    | 105   | -172.02         | 0.12          | 255    | 45    | -163.54         | 0.15          |
| Q2KJJ8          | 340    | 130   | -123.56         | 0.19          | 280    | 135   | -227.18         | 0.22          | 65     | 55    | -154.68         | 0.16          |
| E1BI82          | 355    | 135   | -131.77         | 0.08          | 75     | 110   | -220.88         | 0.25          | 200    | 125   | -128.62         | 0.12          |
| P62992          | 60     | 165   | -131.94         | 0.19          | 125    | 165   | -222.43         | 0.12          | 80     | 70    | -158.90         | 0.17          |
| F1MME1          | 250    | 75    | -120.30         | 0.11          | 250    | 75    | -219.14         | 0.24          | 70     | 55    | -148.76         | 0.13          |
| A4FV69          | 160    | 75    | -82.76          | 0.20          | 215    | 90    | -186.39         | 0.27          | 20     | 60    | -190.74         | 0.16          |
| G3N156          | 80     | 135   | -101.15         | 0.14          | 75     | 145   | -218.29         | 0.27          | 300    | 120   | -178.92         | 0.11          |
| F1MSB7          | 175    | 95    | -91.83          | 0.13          | 175    | 95    | -211.71         | 0.21          | 305    | 15    | -128.81         | 0.10          |
| P28800          | 80     | 75    | -111.18         | 0.19          | 60     | 105   | -210.05         | 0.20          | 280    | 120   | -114.29         | 0.05          |
| Q29451          | 170    | 115   | -130.01         | 0.14          | 175    | 110   | -265.73         | 0.21          | 285    | 115   | -145.00         | 0.02          |
| Q0P5J6          | 125    | 125   | -65.14          | 0.15          | 195    | 125   | -168.13         | 0.14          | 55     | 100   | -139.94         | 0.16          |
| P28801          | 295    | 110   | -76.35          | 0.21          | 65     | 55    | -185.92         | 0.32          | 115    | 165   | -221.82         | 0.08          |
| Q2LGB2          | 335    | 45    | -93.08          | 0.20          | 55     | 50    | -183.27         | 0.28          | 0      | 135   | -198.92         | 0.13          |
| A6QNS6          | 245    | 65    | -57.44          | 0.08          | 245    | 70    | -119.85         | 0.05          | 280    | 130   | -166.56         | 0.14          |
| E1BPC9          | 285    | 115   | -97.75          | 0.02          | 285    | 115   | -187.91         | 0.11          | 260    | 105   | -132.56         | 0.14          |

|        |     |     |         |      |     |     |         |      |     |     |         |      |
|--------|-----|-----|---------|------|-----|-----|---------|------|-----|-----|---------|------|
| Q2HJD1 | 275 | 45  | -91.60  | 0.22 | 55  | 105 | -175.75 | 0.26 | 220 | 45  | -115.49 | 0.10 |
| F1MCX1 | 115 | 165 | -123.51 | 0.09 | 120 | 160 | -241.99 | 0.09 | 320 | 130 | -140.35 | 0.15 |
| O18836 | 250 | 75  | -84.62  | 0.08 | 250 | 80  | -152.02 | 0.14 | 75  | 140 | -173.29 | 0.06 |
| Q17QC7 | 280 | 120 | -76.95  | 0.00 | 340 | 90  | -134.48 | 0.07 | 175 | 95  | -155.23 | 0.09 |
| F1MUZ8 | 70  | 145 | -84.16  | 0.20 | 195 | 160 | -190.63 | 0.25 | 250 | 75  | -199.58 | 0.10 |
| Q58CS8 | 20  | 60  | -121.04 | 0.18 | 20  | 55  | -216.78 | 0.25 | 60  | 165 | -181.46 | 0.15 |
| F1N1I6 | 300 | 120 | -128.18 | 0.14 | 255 | 55  | -223.32 | 0.21 | 145 | 45  | -189.16 | 0.14 |
| F1N789 | 20  | 55  | -129.15 | 0.02 | 15  | 55  | -239.64 | 0.08 | 60  | 100 | -163.22 | 0.16 |
| P00743 | 345 | 60  | -105.17 | 0.15 | 195 | 80  | -193.23 | 0.13 | 195 | 55  | -168.39 | 0.14 |
| A5PKI3 | 180 | 170 | -81.34  | 0.23 | 105 | 45  | -143.53 | 0.22 | 330 | 130 | -145.13 | 0.16 |
| F1MSZ6 | 200 | 60  | -102.61 | 0.20 | 240 | 95  | -199.79 | 0.25 | 255 | 45  | -136.62 | 0.17 |
| E1BBX5 | 95  | 65  | -120.69 | 0.17 | 75  | 75  | -247.09 | 0.22 | 175 | 60  | -164.77 | 0.11 |
| E1BQ21 | 185 | 75  | -92.63  | 0.21 | 300 | 120 | -174.47 | 0.27 | 305 | 145 | -119.49 | 0.17 |
| B0JYP8 | 100 | 90  | -92.47  | 0.22 | 110 | 95  | -173.78 | 0.28 | 130 | 140 | -153.91 | 0.17 |
| Q9MYM4 | 245 | 55  | -110.43 | 0.12 | 240 | 75  | -212.91 | 0.23 | 0   | 150 | -157.65 | 0.11 |
| P50448 | 0   | 45  | -85.67  | 0.07 | 255 | 145 | -157.21 | 0.22 | 80  | 135 | -148.28 | 0.12 |
| Q2KJ63 | 30  | 135 | -132.22 | 0.08 | 30  | 130 | -254.60 | 0.13 | 120 | 20  | -138.32 | 0.18 |
| Q0IIG7 | 335 | 75  | -90.15  | 0.21 | 70  | 10  | -179.47 | 0.19 | 20  | 20  | -173.05 | 0.10 |
| E1B725 | 335 | 110 | -116.60 | 0.16 | 275 | 145 | -209.84 | 0.24 | 290 | 85  | -174.18 | 0.11 |
| Q95M12 | 325 | 30  | -135.52 | 0.12 | 335 | 25  | -215.80 | 0.26 | 195 | 15  | -197.84 | 0.14 |
| F1MNV5 | 350 | 70  | -95.06  | 0.13 | 325 | 90  | -156.97 | 0.28 | 250 | 110 | -160.57 | 0.11 |
| A6QR11 | 0   | 0   | -0.00   | 2.00 | 0   | 0   | -0.00   | 2.00 | 50  | 120 | -158.20 | 0.08 |
| P28783 | 350 | 100 | -85.82  | 0.17 | 60  | 105 | -191.93 | 0.20 | 195 | 100 | -152.24 | 0.08 |
| Q03763 | 185 | 125 | -47.98  | 0.00 | 190 | 130 | -136.22 | 0.05 | 350 | 70  | -143.51 | 0.10 |
| Q3ZBH5 | 110 | 75  | -92.78  | 0.20 | 340 | 20  | -166.79 | 0.26 | 0   | 0   | -0.00   | 2.00 |
| Q5E9Z9 | 50  | 95  | -51.66  | 0.21 | 110 | 70  | -121.25 | 0.04 | 110 | 75  | -98.84  | 0.01 |
| A5D960 | 5   | 150 | -98.07  | 0.15 | 330 | 115 | -194.49 | 0.24 | 5   | 20  | -118.29 | 0.17 |
| G5E513 | 260 | 65  | -83.98  | 0.15 | 260 | 65  | -197.22 | 0.21 | 180 | 130 | -91.99  | 0.13 |
| E1BF48 | 130 | 140 | -107.93 | 0.19 | 175 | 90  | -177.13 | 0.30 | 50  | 110 | -145.19 | 0.04 |
| Q3T169 | 105 | 130 | -100.10 | 0.18 | 165 | 55  | -178.47 | 0.24 | 335 | 75  | -138.72 | 0.17 |
| P62935 | 345 | 35  | -82.44  | 0.22 | 80  | 135 | -160.08 | 0.31 | 30  | 130 | -188.52 | 0.03 |
| F1MUB9 | 255 | 45  | -86.93  | 0.19 | 255 | 50  | -207.36 | 0.27 | 330 | 30  | -194.63 | 0.14 |
| F1MBV6 | 265 | 100 | -91.62  | 0.03 | 30  | 130 | -195.01 | 0.04 | 160 | 130 | -175.87 | 0.16 |
| Q29S21 | 195 | 100 | -89.68  | 0.09 | 200 | 135 | -193.79 | 0.01 | 200 | 60  | -146.14 | 0.16 |
| F1MF70 | 195 | 15  | -115.47 | 0.18 | 200 | 15  | -219.26 | 0.18 | 80  | 75  | -194.28 | 0.13 |
| E1B8B5 | 250 | 110 | -108.42 | 0.13 | 75  | 130 | -187.78 | 0.24 | 110 | 95  | -160.31 | 0.10 |
| F1ML49 | 290 | 85  | -110.80 | 0.12 | 240 | 45  | -211.08 | 0.08 | 15  | 50  | -105.80 | 0.14 |
| G3N2B8 | 115 | 20  | -82.27  | 0.21 | 130 | 35  | -183.03 | 0.28 | 240 | 75  | -170.20 | 0.12 |
| Q76LV1 | 10  | 25  | -100.42 | 0.03 | 15  | 25  | -200.87 | 0.09 | 295 | 120 | -144.20 | 0.16 |
| G3X7N4 | 165 | 85  | -106.01 | 0.16 | 160 | 85  | -183.98 | 0.33 | 15  | 75  | -136.54 | 0.17 |
| F1MY79 | 30  | 55  | -83.33  | 0.08 | 200 | 145 | -211.76 | 0.18 | 290 | 90  | -153.16 | 0.19 |
| A5D984 | 40  | 25  | -107.05 | 0.21 | 35  | 35  | -206.17 | 0.17 | 330 | 120 | -131.47 | 0.08 |
| F1MS40 | 75  | 115 | -94.19  | 0.12 | 70  | 110 | -201.88 | 0.17 | 190 | 130 | -120.81 | 0.06 |
| Q28133 | 105 | 60  | -99.80  | 0.20 | 110 | 65  | -168.45 | 0.30 | 130 | 155 | -159.27 | 0.01 |
| Q2KIW9 | 125 | 105 | -73.11  | 0.20 | 120 | 110 | -156.75 | 0.25 | 255 | 90  | -141.54 | 0.02 |
| F1MGK8 | 180 | 105 | -88.64  | 0.11 | 0   | 55  | -155.03 | 0.09 | 205 | 105 | -128.53 | 0.19 |

|               |     |     |         |      |     |     |         |      |     |     |         |      |
|---------------|-----|-----|---------|------|-----|-----|---------|------|-----|-----|---------|------|
| <b>A6QNL0</b> | 120 | 85  | -97.25  | 0.17 | 130 | 100 | -226.74 | 0.20 | 80  | 120 | -141.32 | 0.14 |
| <b>F1MJK3</b> | 40  | 120 | -110.04 | 0.10 | 40  | 120 | -257.67 | 0.21 | 85  | 15  | -121.67 | 0.15 |
| <b>A4IFG0</b> | 320 | 55  | -105.24 | 0.20 | 75  | 120 | -215.30 | 0.24 | 195 | 145 | -203.21 | 0.16 |
| <b>A7YWM2</b> | 260 | 85  | -83.56  | 0.06 | 260 | 85  | -207.52 | 0.13 | 310 | 85  | -125.63 | 0.03 |
| <b>P62998</b> | 70  | 50  | -86.56  | 0.17 | 75  | 55  | -138.79 | 0.02 | 235 | 55  | -141.42 | 0.15 |
| <b>P13753</b> | 55  | 50  | -116.17 | 0.15 | 60  | 50  | -230.60 | 0.25 | 200 | 40  | -155.41 | 0.17 |
| <b>F1MZQ5</b> | 50  | 40  | -130.02 | 0.15 | 55  | 40  | -252.11 | 0.25 | 55  | 50  | -174.99 | 0.12 |
| <b>P13752</b> | 200 | 40  | -110.72 | 0.20 | 210 | 50  | -205.93 | 0.19 | 55  | 40  | -178.38 | 0.10 |
| <b>Q3SZB7</b> | 135 | 145 | -83.03  | 0.12 | 260 | 95  | -204.75 | 0.19 | 180 | 105 | -127.57 | 0.11 |
| <b>F1N6G4</b> | 195 | 145 | -126.74 | 0.20 | 200 | 145 | -243.25 | 0.31 | 80  | 140 | -126.91 | 0.18 |
| <b>Q2TBL2</b> | 315 | 125 | -61.97  | 0.04 | 320 | 120 | -164.71 | 0.09 | 40  | 120 | -170.68 | 0.04 |
| <b>A1L5C6</b> | 235 | 55  | -89.24  | 0.18 | 160 | 45  | -182.05 | 0.24 | 120 | 85  | -188.26 | 0.12 |
| <b>Q3ZCK3</b> | 270 | 40  | -81.62  | 0.21 | 250 | 95  | -201.69 | 0.26 | 160 | 85  | -168.99 | 0.15 |
| <b>A6QPP2</b> | 330 | 120 | -104.52 | 0.10 | 260 | 95  | -187.04 | 0.24 | 65  | 95  | -153.86 | 0.07 |
| <b>Q3T0Q4</b> | 220 | 65  | -105.39 | 0.19 | 225 | 65  | -189.12 | 0.32 | 105 | 60  | -127.22 | 0.18 |
| <b>Q58DK5</b> | 185 | 100 | -87.19  | 0.19 | 130 | 80  | -187.13 | 0.25 | 15  | 125 | -145.64 | 0.15 |
| <b>A3KLR9</b> | 145 | 165 | -112.07 | 0.15 | 145 | 165 | -209.01 | 0.22 | 220 | 80  | -134.99 | 0.06 |
| <b>F1MH40</b> | 145 | 55  | -84.14  | 0.18 | 85  | 75  | -175.52 | 0.25 | 150 | 150 | -188.90 | 0.02 |
| <b>F1MLU7</b> | 200 | 70  | -70.52  | 0.16 | 25  | 135 | -180.53 | 0.06 | 335 | 155 | -152.77 | 0.17 |
| <b>P63103</b> | 115 | 150 | -68.13  | 0.21 | 110 | 150 | -163.87 | 0.35 | 50  | 115 | -138.54 | 0.11 |
| <b>G3X8C8</b> | 35  | 145 | -101.32 | 0.17 | 35  | 145 | -235.43 | 0.28 | 355 | 115 | -146.51 | 0.06 |
| <b>Q3SZR3</b> | 190 | 105 | -78.89  | 0.15 | 190 | 105 | -183.64 | 0.28 | 70  | 100 | -128.82 | 0.07 |
| <b>Q95121</b> | 85  | 145 | -127.10 | 0.18 | 55  | 95  | -235.75 | 0.20 | 195 | 95  | -169.94 | 0.11 |
| <b>F1MXG6</b> | 115 | 110 | -68.28  | 0.04 | 120 | 115 | -185.60 | 0.05 | 170 | 120 | -170.90 | 0.05 |
| <b>G5E5T5</b> | 265 | 155 | -81.12  | 0.02 | 130 | 30  | -155.23 | 0.01 | 190 | 125 | -159.92 | 0.11 |
| <b>P08166</b> | 330 | 125 | -94.21  | 0.23 | 195 | 45  | -173.10 | 0.27 | 125 | 25  | -143.55 | 0.01 |
| <b>A3KN27</b> | 175 | 100 | -101.47 | 0.07 | 210 | 145 | -225.18 | 0.09 | 185 | 15  | -145.08 | 0.19 |
| <b>Q3SX46</b> | 205 | 10  | -98.88  | 0.20 | 215 | 60  | -206.31 | 0.26 | 285 | 140 | -167.23 | 0.17 |
| <b>A2VE47</b> | 285 | 140 | -106.67 | 0.20 | 285 | 145 | -198.43 | 0.28 | 225 | 15  | -160.35 | 0.01 |
| <b>F1N0Y0</b> | 110 | 45  | -113.20 | 0.11 | 110 | 50  | -222.13 | 0.25 | 35  | 150 | -160.48 | 0.12 |
| <b>F1MR22</b> | 245 | 95  | -79.26  | 0.19 | 265 | 20  | -185.78 | 0.05 | 90  | 140 | -177.96 | 0.16 |
| <b>A3KMY1</b> | 5   | 135 | -113.21 | 0.03 | 20  | 60  | -213.93 | 0.20 | 115 | 110 | -141.52 | 0.04 |
| <b>Q8WML4</b> | 295 | 55  | -67.19  | 0.08 | 70  | 100 | -123.90 | 0.15 | 195 | 105 | -121.41 | 0.16 |
| <b>A5D9E9</b> | 165 | 120 | -107.54 | 0.12 | 165 | 120 | -293.74 | 0.18 | 45  | 95  | -115.82 | 0.08 |
| <b>E1BFG0</b> | 300 | 125 | -115.39 | 0.18 | 210 | 90  | -216.02 | 0.26 | 80  | 70  | -125.03 | 0.13 |
| <b>E1BFG1</b> | 355 | 115 | -104.67 | 0.04 | 355 | 115 | -215.54 | 0.14 | 110 | 150 | -147.84 | 0.18 |
| <b>Q17QK3</b> | 70  | 150 | -106.04 | 0.07 | 80  | 145 | -233.21 | 0.12 | 145 | 45  | -142.00 | 0.17 |
| <b>E1B9D7</b> | 105 | 70  | -62.86  | 0.01 | 95  | 85  | -199.71 | 0.13 | 210 | 135 | -174.21 | 0.13 |
| <b>Q3SYW2</b> | 0   | 65  | -119.31 | 0.10 | 200 | 85  | -220.83 | 0.26 | 25  | 105 | -169.33 | 0.12 |
| <b>G3MXG6</b> | 45  | 55  | -72.40  | 0.07 | 140 | 30  | -165.22 | 0.25 | 10  | 125 | -123.36 | 0.05 |
| <b>G3N3R5</b> | 20  | 60  | -108.60 | 0.08 | 10  | 85  | -243.78 | 0.04 | 90  | 135 | -163.31 | 0.10 |
| <b>F1MSQ6</b> | 310 | 60  | -127.52 | 0.16 | 310 | 60  | -219.12 | 0.26 | 350 | 120 | -173.97 | 0.11 |
| <b>P37980</b> | 40  | 55  | -86.55  | 0.01 | 165 | 115 | -183.24 | 0.29 | 105 | 80  | -171.70 | 0.11 |
| <b>F1MMD7</b> | 135 | 35  | -84.74  | 0.14 | 305 | 80  | -190.30 | 0.23 | 225 | 40  | -139.40 | 0.16 |
| <b>Q5E9G7</b> | 335 | 50  | -41.64  | 0.11 | 65  | 70  | -92.79  | 0.12 | 65  | 70  | -80.03  | 0.05 |
| <b>F1MIH9</b> | 275 | 75  | -135.92 | 0.20 | 130 | 100 | -241.98 | 0.21 | 50  | 0   | -196.13 | 0.10 |

|        |     |     |         |      |     |     |         |      |     |     |         |      |
|--------|-----|-----|---------|------|-----|-----|---------|------|-----|-----|---------|------|
| F1N1Z6 | 15  | 130 | -128.50 | 0.16 | 55  | 0   | -248.83 | 0.23 | 275 | 75  | -180.04 | 0.17 |
| F1MMR8 | 25  | 105 | -116.50 | 0.15 | 25  | 105 | -207.95 | 0.30 | 120 | 135 | -157.19 | 0.11 |
| P68138 | 10  | 125 | -79.99  | 0.09 | 10  | 115 | -192.43 | 0.13 | 315 | 40  | -107.02 | 0.16 |
| G3X6K8 | 125 | 150 | -99.80  | 0.09 | 345 | 50  | -157.37 | 0.22 | 310 | 60  | -178.62 | 0.14 |
| A4IFP2 | 165 | 115 | -122.92 | 0.12 | 25  | 30  | -220.26 | 0.11 | 170 | 105 | -171.53 | 0.09 |
| F1N076 | 290 | 85  | -105.43 | 0.15 | 215 | 105 | -244.14 | 0.24 | 100 | 80  | -111.20 | 0.03 |
| P00978 | 355 | 120 | -129.04 | 0.19 | 45  | 90  | -220.64 | 0.25 | 200 | 85  | -156.47 | 0.13 |
| Q32L50 | 135 | 75  | -104.25 | 0.04 | 100 | 40  | -217.98 | 0.03 | 75  | 145 | -176.22 | 0.09 |
| Q5DPW9 | 140 | 145 | -87.78  | 0.21 | 150 | 135 | -141.56 | 0.33 | 20  | 35  | -155.51 | 0.04 |
| A4IFS7 | 95  | 50  | -88.47  | 0.17 | 10  | 75  | -174.35 | 0.29 | 240 | 140 | -150.19 | 0.06 |
| P40682 | 115 | 25  | -69.72  | 0.14 | 315 | 70  | -159.45 | 0.12 | 295 | 90  | -141.72 | 0.04 |
| P63048 | 10  | 100 | -103.86 | 0.21 | 55  | 160 | -185.19 | 0.31 | 15  | 65  | -139.23 | 0.12 |
| Q2TBX4 | 205 | 120 | -76.33  | 0.18 | 355 | 50  | -190.38 | 0.24 | 230 | 120 | -142.93 | 0.03 |
| G3X7W8 | 325 | 15  | -97.69  | 0.06 | 340 | 15  | -192.58 | 0.17 | 195 | 55  | -145.71 | 0.04 |
| F1MT12 | 110 | 45  | -76.05  | 0.19 | 260 | 70  | -175.66 | 0.20 | 270 | 150 | -95.70  | 0.10 |
| F1MI98 | 35  | 80  | -84.15  | 0.11 | 30  | 75  | -281.89 | 0.10 | 120 | 100 | -172.98 | 0.01 |
| A7YY28 | 210 | 105 | -97.82  | 0.19 | 60  | 130 | -179.28 | 0.27 | 330 | 50  | -166.55 | 0.19 |
| F1N6H6 | 30  | 150 | -79.67  | 0.13 | 195 | 50  | -182.09 | 0.02 | 235 | 90  | -181.71 | 0.15 |
| F1MJV6 | 235 | 115 | -110.58 | 0.04 | 165 | 25  | -219.62 | 0.05 | 350 | 115 | -146.85 | 0.15 |
| Q27960 | 260 | 150 | -81.20  | 0.19 | 10  | 120 | -165.69 | 0.23 | 265 | 70  | -143.14 | 0.11 |
| Q9NOV4 | 330 | 45  | -113.30 | 0.22 | 210 | 65  | -207.66 | 0.23 | 245 | 65  | -152.56 | 0.15 |
| E1BBP1 | 235 | 90  | -123.54 | 0.18 | 340 | 170 | -246.77 | 0.23 | 115 | 110 | -144.46 | 0.03 |
| F1N3M3 | 270 | 145 | -57.79  | 0.14 | 265 | 140 | -109.49 | 0.22 | 35  | 80  | -163.82 | 0.11 |
| G3MYM8 | 115 | 95  | -119.46 | 0.03 | 295 | 25  | -264.19 | 0.05 | 95  | 45  | -143.07 | 0.19 |
| A7YWK3 | 185 | 110 | -87.56  | 0.05 | 185 | 110 | -261.26 | 0.09 | 220 | 65  | -86.22  | 0.17 |
| P02666 | 15  | 65  | -99.90  | 0.18 | 210 | 85  | -123.25 | 0.39 | 150 | 140 | -126.42 | 0.17 |
| Q58D62 | 175 | 125 | -105.41 | 0.08 | 65  | 55  | -209.55 | 0.22 | 355 | 25  | -147.89 | 0.17 |
| Q3SZ62 | 320 | 40  | -102.25 | 0.20 | 5   | 55  | -199.10 | 0.24 | 45  | 155 | -158.48 | 0.17 |
| A6QNV3 | 175 | 40  | -57.80  | 0.18 | 175 | 40  | -82.16  | 0.36 | 270 | 40  | -194.55 | 0.08 |
| F1MJQ1 | 90  | 155 | -80.78  | 0.22 | 100 | 115 | -168.16 | 0.29 | 175 | 115 | -123.84 | 0.18 |
| Q28065 | 130 | 100 | -59.32  | 0.20 | 235 | 120 | -172.00 | 0.09 | 270 | 110 | -178.47 | 0.14 |
| G3MXC4 | 180 | 45  | -52.54  | 0.21 | 205 | 25  | -88.84  | 0.00 | 235 | 25  | -126.55 | 0.19 |
| G8JKV7 | 10  | 10  | -94.16  | 0.20 | 340 | 0   | -183.21 | 0.25 | 250 | 120 | -265.27 | 0.12 |
| Q3MHM5 | 130 | 135 | -95.55  | 0.19 | 130 | 135 | -188.45 | 0.22 | 145 | 95  | -150.53 | 0.14 |
| P80195 | 20  | 90  | -76.06  | 0.21 | 355 | 110 | -170.46 | 0.31 | 55  | 75  | -195.78 | 0.06 |
| P24627 | 205 | 80  | -163.89 | 0.18 | 200 | 80  | -241.94 | 0.21 | 325 | 80  | -126.16 | 0.17 |
| G3MYU2 | 225 | 150 | -102.67 | 0.14 | 210 | 145 | -240.21 | 0.15 | 130 | 145 | -228.98 | 0.08 |
| F1N529 | 110 | 115 | -89.83  | 0.15 | 10  | 70  | -184.13 | 0.23 | 250 | 85  | -168.80 | 0.14 |
| Q05443 | 240 | 100 | -90.02  | 0.17 | 240 | 100 | -207.51 | 0.29 | 275 | 120 | -129.73 | 0.12 |
| Q5E9X0 | 105 | 60  | -111.25 | 0.01 | 140 | 70  | -194.90 | 0.30 | 245 | 70  | -200.53 | 0.10 |
| Q2T9S4 | 60  | 20  | -112.28 | 0.19 | 335 | 140 | -160.35 | 0.26 | 140 | 70  | -150.25 | 0.16 |
| P00570 | 245 | 130 | -82.70  | 0.20 | 185 | 150 | -166.07 | 0.29 | 240 | 100 | -179.04 | 0.13 |
| Q0I1H5 | 15  | 100 | -65.60  | 0.02 | 355 | 105 | -154.39 | 0.02 | 160 | 100 | -228.42 | 0.08 |
| Q148C9 | 70  | 75  | -80.96  | 0.22 | 110 | 70  | -193.43 | 0.29 | 265 | 70  | -134.87 | 0.18 |
| A6QLY7 | 160 | 100 | -149.09 | 0.07 | 160 | 100 | -265.12 | 0.19 | 55  | 20  | -152.07 | 0.16 |
| Q1RMJ6 | 145 | 95  | -93.70  | 0.17 | 145 | 95  | -198.54 | 0.26 | 10  | 100 | -144.84 | 0.06 |

|        |     |     |         |      |     |     |         |      |     |     |         |      |
|--------|-----|-----|---------|------|-----|-----|---------|------|-----|-----|---------|------|
| A5PJH7 | 55  | 75  | -152.92 | 0.08 | 55  | 75  | -202.33 | 0.23 | 110 | 70  | -148.21 | 0.11 |
| F1MMI6 | 250 | 120 | -155.10 | 0.13 | 250 | 115 | -280.72 | 0.09 | 235 | 120 | -109.00 | 0.05 |
| G3N2D8 | 245 | 90  | -110.29 | 0.19 | 295 | 35  | -229.72 | 0.22 | 180 | 45  | -77.34  | 0.20 |
| Q4U5R3 | 275 | 120 | -87.22  | 0.16 | 240 | 65  | -185.84 | 0.18 | 205 | 95  | -160.41 | 0.14 |
| P15497 | 250 | 65  | -128.45 | 0.12 | 250 | 65  | -327.49 | 0.20 | 265 | 20  | -158.99 | 0.17 |
| G3X745 | 125 | 145 | -156.01 | 0.04 | 130 | 140 | -268.81 | 0.15 | 175 | 40  | -87.92  | 0.16 |
| P63258 | 160 | 65  | -85.57  | 0.19 | 340 | 100 | -182.75 | 0.18 | 80  | 55  | -120.46 | 0.09 |
| G3N0T0 | 270 | 110 | -94.51  | 0.18 | 275 | 110 | -204.84 | 0.26 | 115 | 115 | -145.20 | 0.10 |
| Q3T000 | 355 | 150 | -77.64  | 0.22 | 340 | 150 | -153.97 | 0.28 | 215 | 150 | -183.41 | 0.07 |
| B0JYR0 | 270 | 40  | -149.84 | 0.13 | 270 | 40  | -235.60 | 0.27 | 205 | 80  | -232.30 | 0.15 |
| P13696 | 205 | 110 | -85.13  | 0.19 | 210 | 25  | -181.69 | 0.30 | 10  | 90  | -125.53 | 0.19 |
| P56652 | 55  | 65  | -120.98 | 0.08 | 105 | 135 | -208.67 | 0.18 | 265 | 70  | -153.35 | 0.18 |
| F1MW38 | 275 | 130 | -71.90  | 0.10 | 275 | 130 | -153.64 | 0.24 | 250 | 80  | -154.92 | 0.08 |
| M0QVY0 | 330 | 50  | -77.39  | 0.06 | 355 | 75  | -201.80 | 0.09 | 255 | 130 | -121.65 | 0.16 |
| Q2KI84 | 70  | 100 | -86.16  | 0.17 | 65  | 95  | -173.80 | 0.22 | 20  | 120 | -143.11 | 0.12 |
| F1MEP6 | 300 | 130 | -95.82  | 0.17 | 15  | 70  | -145.76 | 0.26 | 70  | 65  | -191.27 | 0.07 |
| O97817 | 330 | 135 | -104.54 | 0.19 | 30  | 100 | -244.30 | 0.13 | 125 | 135 | -160.26 | 0.13 |
| E1BGJ4 | 160 | 110 | -140.30 | 0.09 | 170 | 115 | -297.83 | 0.23 | 160 | 140 | -207.25 | 0.01 |
| Q0II48 | 190 | 165 | -111.29 | 0.20 | 190 | 160 | -218.55 | 0.29 | 290 | 40  | -165.62 | 0.08 |
| F1N2D5 | 255 | 50  | -97.76  | 0.19 | 235 | 150 | -204.92 | 0.19 | 335 | 165 | -133.36 | 0.17 |
| P21793 | 10  | 130 | -111.74 | 0.18 | 40  | 115 | -206.44 | 0.23 | 15  | 125 | -150.77 | 0.06 |
| F1MFI4 | 10  | 125 | -114.42 | 0.17 | 160 | 110 | -258.98 | 0.09 | 10  | 95  | -168.14 | 0.16 |
| Q8SPP7 | 340 | 165 | -100.48 | 0.20 | 350 | 170 | -202.45 | 0.22 | 170 | 105 | -146.18 | 0.08 |
| F1MCL0 | 20  | 125 | -148.96 | 0.10 | 20  | 125 | -230.54 | 0.21 | 130 | 90  | -211.81 | 0.08 |
| P46193 | 180 | 60  | -87.00  | 0.19 | 145 | 55  | -193.78 | 0.14 | 190 | 60  | -152.25 | 0.17 |
| F1MYX5 | 170 | 105 | -95.65  | 0.14 | 5   | 35  | -225.75 | 0.28 | 295 | 125 | -198.22 | 0.16 |
| F1MM13 | 130 | 90  | -120.17 | 0.11 | 130 | 90  | -241.40 | 0.22 | 300 | 130 | -140.97 | 0.14 |
| G5E6M1 | 120 | 135 | -111.01 | 0.09 | 200 | 75  | -190.25 | 0.05 | 100 | 85  | -131.47 | 0.13 |
| Q29437 | 70  | 65  | -123.44 | 0.11 | 70  | 65  | -278.36 | 0.21 | 295 | 10  | -172.99 | 0.12 |
| Q2TBX9 | 20  | 120 | -90.98  | 0.14 | 20  | 120 | -235.38 | 0.21 | 285 | 95  | -144.19 | 0.04 |
| F1MYJ3 | 105 | 40  | -105.81 | 0.21 | 295 | 40  | -279.83 | 0.22 | 125 | 115 | -139.76 | 0.10 |
| Q2HJB6 | 180 | 145 | -118.70 | 0.13 | 160 | 140 | -229.48 | 0.20 | 195 | 165 | -166.52 | 0.18 |
| Q08DL0 | 250 | 80  | -109.23 | 0.11 | 185 | 105 | -188.67 | 0.22 | 190 | 95  | -147.17 | 0.16 |
| Q2KIX7 | 10  | 145 | -110.30 | 0.21 | 215 | 75  | -171.37 | 0.25 | 30  | 100 | -153.66 | 0.05 |
| E1B6Z6 | 175 | 130 | -80.05  | 0.24 | 260 | 130 | -151.13 | 0.30 | 170 | 115 | -240.68 | 0.07 |
| Q1RMU6 | 150 | 170 | -113.17 | 0.16 | 65  | 15  | -191.73 | 0.27 | 120 | 85  | -142.24 | 0.09 |
| F1MMV6 | 205 | 100 | -103.41 | 0.11 | 150 | 35  | -168.48 | 0.29 | 265 | 115 | -182.59 | 0.15 |
| E1BD43 | 210 | 90  | -116.89 | 0.18 | 210 | 95  | -231.65 | 0.24 | 110 | 110 | -140.53 | 0.16 |
| Q32KV6 | 260 | 125 | -86.35  | 0.05 | 290 | 155 | -185.16 | 0.16 | 270 | 80  | -168.20 | 0.11 |
| Q2TA49 | 235 | 125 | -114.93 | 0.01 | 235 | 125 | -159.97 | 0.23 | 25  | 60  | -173.08 | 0.08 |
| Q9GLE5 | 190 | 80  | -99.20  | 0.11 | 205 | 155 | -209.58 | 0.23 | 340 | 95  | -229.36 | 0.05 |
| A5PKH3 | 130 | 145 | -113.50 | 0.18 | 130 | 140 | -179.91 | 0.29 | 80  | 130 | -154.98 | 0.13 |
| P69678 | 170 | 55  | -125.15 | 0.17 | 165 | 50  | -168.98 | 0.27 | 105 | 85  | -194.35 | 0.06 |
| F1MDS0 | 40  | 80  | -93.72  | 0.06 | 40  | 80  | -114.67 | 0.24 | 205 | 65  | -143.60 | 0.18 |
| F1MRQ8 | 215 | 115 | -107.25 | 0.20 | 215 | 115 | -240.20 | 0.29 | 35  | 75  | -111.00 | 0.16 |
| Q2TBI0 | 15  | 160 | -89.01  | 0.17 | 255 | 115 | -201.36 | 0.16 | 235 | 125 | -158.59 | 0.02 |

|        |     |     |         |      |     |     |         |      |     |     |         |      |
|--------|-----|-----|---------|------|-----|-----|---------|------|-----|-----|---------|------|
| Q0V8R6 | 55  | 55  | -114.55 | 0.09 | 225 | 105 | -182.51 | 0.17 | 205 | 160 | -161.25 | 0.15 |
| E1B748 | 340 | 90  | -139.75 | 0.14 | 350 | 110 | -274.08 | 0.08 | 300 | 30  | -125.98 | 0.18 |
| F1MEW1 | 25  | 60  | -132.53 | 0.11 | 25  | 60  | -211.47 | 0.18 | 55  | 60  | -153.95 | 0.15 |
| G3X701 | 340 | 175 | -73.29  | 0.14 | 310 | 170 | -162.31 | 0.24 | 215 | 115 | -186.56 | 0.14 |
| Q32LG3 | 205 | 70  | -92.68  | 0.22 | 60  | 20  | -210.16 | 0.27 | 270 | 110 | -142.57 | 0.07 |
| F1MTI7 | 80  | 125 | -99.71  | 0.19 | 80  | 60  | -172.46 | 0.25 | 170 | 55  | -148.13 | 0.14 |
| Q3ZCJ8 | 75  | 55  | -111.48 | 0.19 | 240 | 140 | -276.82 | 0.17 | 45  | 80  | -118.69 | 0.07 |
| Q3SZ18 | 265 | 115 | -91.93  | 0.18 | 265 | 115 | -210.04 | 0.29 | 130 | 145 | -167.05 | 0.17 |
| F1MB08 | 120 | 85  | -94.67  | 0.13 | 120 | 85  | -217.86 | 0.20 | 345 | 65  | -145.12 | 0.10 |
| Q28161 | 265 | 75  | -120.36 | 0.06 | 270 | 80  | -211.27 | 0.25 | 210 | 90  | -184.91 | 0.15 |
| P0CH28 | 110 | 110 | -89.16  | 0.18 | 105 | 105 | -160.26 | 0.30 | 70  | 15  | -169.93 | 0.13 |
| E1BGX8 | 130 | 130 | -140.28 | 0.01 | 40  | 85  | -221.01 | 0.28 | 130 | 60  | -145.04 | 0.13 |
| P02081 | 220 | 105 | -89.99  | 0.20 | 40  | 85  | -152.02 | 0.25 | 300 | 90  | -147.50 | 0.18 |
| E1BKQ9 | 115 | 55  | -82.38  | 0.07 | 150 | 45  | -147.85 | 0.09 | 195 | 95  | -107.94 | 0.18 |
| F1MD95 | 15  | 130 | -51.04  | 0.06 | 30  | 165 | -75.58  | 0.03 | 55  | 100 | -202.27 | 0.13 |
| Q3T0E5 | 205 | 150 | -105.78 | 0.21 | 160 | 170 | -175.21 | 0.22 | 285 | 75  | -105.28 | 0.08 |
| A6QL77 | 215 | 115 | -101.68 | 0.17 | 220 | 115 | -249.07 | 0.29 | 140 | 105 | -149.34 | 0.12 |
| P68265 | 190 | 115 | -80.45  | 0.18 | 205 | 50  | -226.10 | 0.24 | 60  | 20  | -120.88 | 0.03 |
| Q9TUM6 | 335 | 85  | -82.57  | 0.12 | 175 | 90  | -196.37 | 0.12 | 260 | 65  | -134.77 | 0.18 |
| Q3ZBV9 | 160 | 130 | -122.00 | 0.21 | 230 | 45  | -203.77 | 0.28 | 50  | 25  | -167.35 | 0.11 |
| F1MVS9 | 150 | 115 | -109.70 | 0.07 | 280 | 40  | -212.47 | 0.08 | 165 | 135 | -152.49 | 0.15 |
| F1MJM4 | 150 | 80  | -98.57  | 0.17 | 155 | 80  | -192.49 | 0.29 | 250 | 50  | -131.14 | 0.09 |
| Q3SZV7 | 165 | 135 | -119.86 | 0.17 | 315 | 130 | -189.48 | 0.25 | 155 | 80  | -149.08 | 0.13 |
| F1N045 | 0   | 40  | -65.60  | 0.11 | 0   | 40  | -156.65 | 0.17 | 290 | 50  | -159.02 | 0.17 |
| P80311 | 260 | 60  | -96.13  | 0.22 | 185 | 95  | -154.35 | 0.27 | 205 | 115 | -156.67 | 0.16 |
| F1N362 | 45  | 25  | -94.14  | 0.05 | 15  | 145 | -220.87 | 0.06 | 205 | 150 | -152.92 | 0.18 |
| Q8MI01 | 20  | 95  | -64.56  | 0.02 | 275 | 100 | -124.74 | 0.09 | 15  | 130 | -83.97  | 0.10 |
| Q2KJE7 | 85  | 120 | -144.25 | 0.11 | 55  | 100 | -250.28 | 0.26 | 220 | 115 | -198.59 | 0.12 |
| F1MXX6 | 300 | 90  | -98.18  | 0.21 | 325 | 80  | -183.01 | 0.25 | 110 | 55  | -118.55 | 0.05 |
| Q3MHJ4 | 315 | 55  | -61.47  | 0.21 | 45  | 135 | -141.58 | 0.24 | 215 | 110 | -141.60 | 0.05 |
| A5PKB4 | 15  | 15  | -89.69  | 0.20 | 125 | 60  | -181.52 | 0.26 | 125 | 135 | -194.10 | 0.04 |
| P02769 | 140 | 105 | -83.31  | 0.17 | 140 | 105 | -187.85 | 0.26 | 160 | 130 | -168.75 | 0.17 |
| A5D7Q6 | 285 | 75  | -64.73  | 0.15 | 285 | 75  | -113.73 | 0.27 | 10  | 60  | -136.52 | 0.06 |
| Q3SYS6 | 160 | 160 | -88.26  | 0.20 | 155 | 160 | -186.90 | 0.28 | 85  | 120 | -182.44 | 0.12 |
| P38657 | 65  | 45  | -95.50  | 0.11 | 35  | 140 | -243.40 | 0.09 | 140 | 65  | -135.31 | 0.17 |
| P00711 | 20  | 80  | -48.10  | 0.21 | 0   | 90  | -149.41 | 0.31 | 340 | 80  | -128.03 | 0.17 |
| A6QL48 | 340 | 50  | -126.39 | 0.18 | 340 | 50  | -179.54 | 0.35 | 145 | 155 | -163.09 | 0.17 |
| E1BI98 | 285 | 10  | -124.20 | 0.11 | 320 | 10  | -268.57 | 0.15 | 130 | 95  | -184.36 | 0.11 |
| E1BM57 | 195 | 100 | -79.34  | 0.19 | 190 | 105 | -182.50 | 0.33 | 180 | 30  | -119.74 | 0.03 |
| Q6ZXD2 | 295 | 90  | -110.21 | 0.20 | 290 | 95  | -211.25 | 0.22 | 125 | 105 | -113.97 | 0.17 |
| A5PK77 | 115 | 125 | -82.37  | 0.22 | 115 | 125 | -204.68 | 0.23 | 265 | 90  | -138.88 | 0.12 |
| G3MZ71 | 220 | 90  | -83.48  | 0.08 | 220 | 95  | -201.78 | 0.20 | 90  | 70  | -152.96 | 0.17 |
| A6QPQ2 | 0   | 0   | -0.00   | 2.00 | 0   | 0   | -0.00   | 2.00 | 320 | 85  | -127.92 | 0.07 |
| F1MU22 | 275 | 125 | -115.89 | 0.18 | 280 | 120 | -256.38 | 0.27 | 180 | 25  | -162.08 | 0.16 |
| Q1RMN9 | 20  | 135 | -95.99  | 0.15 | 355 | 130 | -200.40 | 0.17 | 125 | 100 | -191.39 | 0.05 |
| F1MGN0 | 235 | 170 | -156.69 | 0.18 | 245 | 175 | -272.67 | 0.22 | 25  | 110 | -104.86 | 0.08 |

|        |     |     |         |      |     |     |         |      |     |     |         |      |
|--------|-----|-----|---------|------|-----|-----|---------|------|-----|-----|---------|------|
| O02659 | 140 | 25  | -124.48 | 0.07 | 105 | 60  | -226.80 | 0.15 | 325 | 125 | -135.14 | 0.06 |
| P79121 | 270 | 85  | -78.57  | 0.06 | 105 | 140 | -159.94 | 0.27 | 155 | 20  | -177.31 | 0.09 |
| F1MLI8 | 40  | 110 | -64.45  | 0.11 | 250 | 90  | -159.61 | 0.05 | 0   | 0   | -0.00   | 2.00 |
| O02751 | 90  | 70  | -91.16  | 0.19 | 10  | 15  | -177.83 | 0.04 | 185 | 40  | -137.54 | 0.08 |
| F1N3Q7 | 220 | 110 | -73.48  | 0.09 | 205 | 110 | -205.64 | 0.08 | 115 | 125 | -175.11 | 0.04 |
| Q3ZBG1 | 200 | 135 | -80.58  | 0.20 | 105 | 125 | -153.42 | 0.24 | 295 | 90  | -175.42 | 0.15 |
| A5D7R9 | 70  | 125 | -77.46  | 0.21 | 265 | 90  | -192.43 | 0.26 | 225 | 150 | -207.56 | 0.14 |
| E1B9M9 | 345 | 140 | -78.87  | 0.22 | 140 | 65  | -174.16 | 0.30 | 165 | 80  | -151.35 | 0.14 |
| Q2KIV9 | 140 | 160 | -103.17 | 0.19 | 125 | 155 | -174.24 | 0.18 | 250 | 130 | -186.44 | 0.06 |
| A7E3Q8 | 130 | 95  | -123.48 | 0.15 | 130 | 95  | -244.43 | 0.25 | 45  | 130 | -144.77 | 0.08 |
| Q5E984 | 335 | 75  | -87.23  | 0.20 | 340 | 80  | -149.55 | 0.38 | 140 | 165 | -133.87 | 0.15 |
| E1BLC2 | 25  | 140 | -83.74  | 0.21 | 180 | 40  | -170.90 | 0.29 | 190 | 105 | -158.94 | 0.14 |
| Q2KIV8 | 110 | 130 | -86.33  | 0.17 | 80  | 115 | -235.99 | 0.25 | 340 | 50  | -170.94 | 0.16 |
| A8YXZ2 | 125 | 100 | -172.69 | 0.08 | 220 | 130 | -189.90 | 0.27 | 290 | 10  | -221.94 | 0.13 |
| Q3T0K1 | 180 | 30  | -84.24  | 0.18 | 225 | 125 | -199.43 | 0.23 | 5   | 90  | -127.74 | 0.18 |
| Q3ZBW5 | 150 | 45  | -83.02  | 0.19 | 140 | 40  | -158.12 | 0.28 | 175 | 145 | -134.99 | 0.16 |
| F1MNI4 | 260 | 60  | -85.86  | 0.17 | 130 | 115 | -163.36 | 0.31 | 70  | 135 | -153.09 | 0.09 |
| P16368 | 340 | 125 | -65.28  | 0.19 | 85  | 160 | -156.17 | 0.23 | 325 | 45  | -129.58 | 0.15 |
| A1A4K5 | 195 | 140 | -138.41 | 0.02 | 295 | 100 | -227.59 | 0.12 | 280 | 40  | -168.07 | 0.17 |
| Q9TTE1 | 340 | 90  | -84.26  | 0.17 | 285 | 95  | -197.36 | 0.21 | 235 | 5   | -134.45 | 0.16 |
| G3MXH2 | 115 | 95  | -122.75 | 0.21 | 305 | 115 | -227.80 | 0.26 | 55  | 25  | -125.93 | 0.17 |
| E1BI28 | 220 | 110 | -85.71  | 0.19 | 250 | 155 | -175.52 | 0.28 | 50  | 40  | -145.32 | 0.03 |
| A6QLR1 | 60  | 115 | -50.62  | 0.06 | 205 | 130 | -113.78 | 0.00 | 35  | 60  | -169.36 | 0.17 |
| F1MTT3 | 130 | 130 | -83.02  | 0.13 | 75  | 85  | -151.67 | 0.22 | 70  | 50  | -136.07 | 0.09 |
| A7E3W2 | 345 | 140 | -105.64 | 0.17 | 340 | 140 | -209.22 | 0.12 | 175 | 125 | -183.89 | 0.09 |
| F1N1N6 | 330 | 90  | -121.82 | 0.06 | 315 | 100 | -210.68 | 0.11 | 90  | 55  | -108.14 | 0.18 |
| G3MYW7 | 80  | 95  | -78.71  | 0.14 | 185 | 135 | -214.56 | 0.25 | 200 | 160 | -154.02 | 0.16 |
| F1N3H1 | 55  | 50  | -85.58  | 0.18 | 30  | 120 | -153.92 | 0.28 | 100 | 110 | -144.76 | 0.02 |
| Q08E20 | 165 | 120 | -129.82 | 0.17 | 180 | 125 | -228.45 | 0.27 | 210 | 65  | -119.12 | 0.06 |
| A6QP32 | 5   | 70  | -69.82  | 0.12 | 70  | 45  | -170.80 | 0.11 | 110 | 70  | -96.37  | 0.06 |
| F1N4Y5 | 40  | 55  | -107.60 | 0.16 | 45  | 60  | -245.62 | 0.25 | 245 | 150 | -134.49 | 0.16 |
| F1MIQ2 | 95  | 110 | -98.75  | 0.03 | 335 | 100 | -191.29 | 0.09 | 185 | 135 | -151.08 | 0.10 |
| F1MKH8 | 220 | 60  | -101.53 | 0.12 | 325 | 30  | -199.87 | 0.29 | 175 | 20  | -147.19 | 0.15 |
| Q08DV2 | 245 | 110 | -62.35  | 0.20 | 25  | 115 | -161.23 | 0.26 | 325 | 90  | -160.02 | 0.10 |
| Q28193 | 65  | 25  | -104.56 | 0.14 | 70  | 135 | -202.75 | 0.25 | 345 | 140 | -147.34 | 0.13 |
| G1K122 | 180 | 145 | -91.01  | 0.18 | 230 | 125 | -190.43 | 0.17 | 150 | 45  | -127.03 | 0.16 |
| P08037 | 85  | 30  | -103.27 | 0.20 | 235 | 70  | -186.25 | 0.22 | 115 | 95  | -169.00 | 0.18 |
| Q6B856 | 320 | 70  | -95.19  | 0.17 | 260 | 15  | -196.00 | 0.27 | 235 | 125 | -145.94 | 0.15 |
| E1BC58 | 45  | 30  | -76.53  | 0.21 | 65  | 25  | -161.79 | 0.27 | 190 | 140 | -200.88 | 0.09 |
| Q0VCX1 | 305 | 55  | -105.18 | 0.20 | 280 | 40  | -203.27 | 0.33 | 270 | 75  | -121.55 | 0.18 |
| Q3T0I2 | 235 | 20  | -84.17  | 0.18 | 230 | 20  | -184.35 | 0.23 | 95  | 140 | -118.28 | 0.18 |
| Q3T052 | 20  | 85  | -93.65  | 0.19 | 240 | 105 | -236.77 | 0.13 | 150 | 80  | -153.37 | 0.14 |
| Q3ZC09 | 135 | 150 | -132.13 | 0.19 | 130 | 130 | -278.98 | 0.27 | 140 | 20  | -185.81 | 0.06 |
| Q5E9F7 | 120 | 105 | -73.86  | 0.22 | 15  | 80  | -148.50 | 0.27 | 180 | 80  | -143.48 | 0.14 |
| A6H7J6 | 220 | 40  | -82.67  | 0.07 | 300 | 95  | -203.11 | 0.16 | 210 | 100 | -177.35 | 0.02 |
| Q17QG8 | 205 | 120 | -84.15  | 0.04 | 200 | 115 | -176.50 | 0.21 | 90  | 45  | -156.58 | 0.14 |



|        |     |     |         |      |     |     |         |      |     |     |         |      |
|--------|-----|-----|---------|------|-----|-----|---------|------|-----|-----|---------|------|
| P02702 | 110 | 40  | -150.84 | 0.20 | 110 | 40  | -216.02 | 0.36 | 200 | 70  | -112.59 | 0.09 |
| Q9N2I2 | 115 | 130 | -148.00 | 0.17 | 115 | 130 | -218.05 | 0.32 | 5   | 100 | -173.68 | 0.01 |
| E1BKZ9 | 240 | 165 | -135.90 | 0.18 | 40  | 105 | -209.28 | 0.23 | 210 | 75  | -146.00 | 0.03 |
| P12763 | 235 | 130 | -97.21  | 0.19 | 270 | 140 | -157.69 | 0.15 | 125 | 145 | -138.11 | 0.10 |
| F1ME65 | 25  | 25  | -83.29  | 0.03 | 345 | 150 | -194.27 | 0.00 | 250 | 60  | -176.00 | 0.14 |
| A2I7N2 | 225 | 45  | -75.86  | 0.16 | 115 | 125 | -191.90 | 0.24 | 275 | 80  | -178.58 | 0.03 |
| A2I7N3 | 325 | 75  | -75.08  | 0.16 | 115 | 125 | -186.39 | 0.28 | 115 | 115 | -141.69 | 0.12 |
| F1MLW8 | 245 | 95  | -64.33  | 0.18 | 255 | 90  | -155.92 | 0.21 | 250 | 105 | -178.09 | 0.18 |
| Q3SZF2 | 290 | 25  | -91.76  | 0.23 | 180 | 105 | -186.91 | 0.30 | 120 | 125 | -149.04 | 0.14 |
| A3KMV5 | 90  | 110 | -92.89  | 0.08 | 320 | 75  | -180.26 | 0.16 | 305 | 70  | -124.05 | 0.16 |
| E1BAB5 | 5   | 100 | -106.84 | 0.06 | 10  | 90  | -281.46 | 0.04 | 40  | 10  | -178.70 | 0.01 |
| Q5EA79 | 90  | 50  | -93.86  | 0.17 | 90  | 45  | -197.64 | 0.30 | 35  | 95  | -134.57 | 0.13 |
| Q2LGB5 | 285 | 30  | -75.99  | 0.12 | 160 | 65  | -159.75 | 0.18 | 290 | 25  | -132.49 | 0.18 |
| A6QPT7 | 320 | 145 | -82.42  | 0.12 | 340 | 65  | -212.28 | 0.22 | 195 | 25  | -106.53 | 0.07 |
| Q2KJ51 | 215 | 90  | -117.78 | 0.05 | 210 | 100 | -212.02 | 0.12 | 110 | 40  | -195.00 | 0.18 |
| P54228 | 145 | 100 | -100.02 | 0.21 | 155 | 80  | -196.25 | 0.27 | 110 | 125 | -228.59 | 0.06 |
| F1MDD8 | 140 | 20  | -106.17 | 0.03 | 105 | 25  | -242.43 | 0.12 | 205 | 120 | -142.67 | 0.06 |
| Q1JPE3 | 250 | 60  | -134.26 | 0.19 | 15  | 5   | -217.04 | 0.23 | 235 | 130 | -141.60 | 0.16 |
| F1MG91 | 155 | 55  | -107.45 | 0.16 | 305 | 0   | -217.28 | 0.21 | 50  | 100 | -193.58 | 0.15 |
| Q2KIW4 | 285 | 145 | -126.45 | 0.18 | 275 | 80  | -205.64 | 0.19 | 130 | 130 | -221.94 | 0.15 |
| Q17QC1 | 85  | 70  | -106.82 | 0.20 | 255 | 110 | -217.36 | 0.27 | 140 | 55  | -168.10 | 0.10 |
| E1BJH7 | 50  | 35  | -81.03  | 0.21 | 245 | 125 | -184.61 | 0.23 | 220 | 40  | -133.55 | 0.10 |
| A5D7S4 | 55  | 85  | -99.11  | 0.15 | 295 | 60  | -205.76 | 0.19 | 120 | 105 | -108.22 | 0.18 |
| A5PKC2 | 50  | 45  | -93.00  | 0.12 | 220 | 30  | -167.58 | 0.23 | 340 | 170 | -146.42 | 0.04 |
| Q2KJ64 | 190 | 115 | -112.53 | 0.22 | 5   | 80  | -219.24 | 0.22 | 160 | 65  | -156.48 | 0.10 |
| Q9XSC6 | 130 | 110 | -86.55  | 0.17 | 95  | 80  | -240.38 | 0.08 | 325 | 90  | -198.56 | 0.04 |
| Q58DS9 | 145 | 115 | -79.38  | 0.20 | 150 | 120 | -161.55 | 0.28 | 240 | 65  | -169.65 | 0.08 |
| Q2KJD0 | 325 | 70  | -104.63 | 0.19 | 325 | 75  | -211.62 | 0.11 | 335 | 130 | -172.47 | 0.07 |
| Q2KIT0 | 295 | 90  | -119.63 | 0.18 | 300 | 85  | -191.24 | 0.26 | 220 | 105 | -142.92 | 0.17 |
| F1MMK9 | 165 | 105 | -124.32 | 0.13 | 170 | 100 | -240.67 | 0.13 | 160 | 75  | -148.27 | 0.09 |
| F1MUP9 | 335 | 120 | -137.27 | 0.16 | 335 | 115 | -210.70 | 0.31 | 200 | 130 | -153.03 | 0.03 |
| F1N1C7 | 245 | 115 | -132.69 | 0.02 | 240 | 120 | -292.58 | 0.14 | 290 | 80  | -182.37 | 0.07 |
| E1BJB1 | 215 | 15  | -109.63 | 0.16 | 245 | 5   | -196.56 | 0.27 | 315 | 30  | -181.16 | 0.12 |
| Q3ZBS7 | 60  | 90  | -97.98  | 0.14 | 60  | 90  | -224.05 | 0.25 | 60  | 90  | -185.38 | 0.12 |
| Q3SYU6 | 310 | 30  | -117.15 | 0.19 | 280 | 95  | -227.28 | 0.20 | 335 | 120 | -162.17 | 0.15 |
| Q6R8F2 | 70  | 65  | -47.20  | 0.10 | 115 | 100 | -82.36  | 0.01 | 240 | 120 | -219.84 | 0.03 |
| Q3SX14 | 260 | 90  | -95.04  | 0.10 | 330 | 125 | -234.87 | 0.10 | 220 | 10  | -176.99 | 0.16 |
| A7MBI6 | 325 | 95  | -92.66  | 0.19 | 160 | 85  | -181.18 | 0.29 | 35  | 75  | -141.02 | 0.08 |
| P02676 | 95  | 120 | -113.01 | 0.04 | 150 | 35  | -215.44 | 0.05 | 160 | 40  | -144.61 | 0.06 |
| A6QP39 | 30  | 75  | -91.29  | 0.07 | 35  | 75  | -226.25 | 0.14 | 160 | 85  | -136.34 | 0.11 |
| Q2NKZ9 | 340 | 115 | -99.96  | 0.19 | 205 | 25  | -190.26 | 0.29 | 10  | 125 | -65.92  | 0.05 |
| Q148H5 | 195 | 130 | -96.43  | 0.02 | 215 | 145 | -242.30 | 0.12 | 80  | 75  | -147.84 | 0.13 |
| O46406 | 70  | 65  | -106.71 | 0.09 | 270 | 70  | -214.38 | 0.20 | 230 | 10  | -166.48 | 0.16 |
| P19120 | 70  | 40  | -92.07  | 0.16 | 160 | 75  | -205.44 | 0.19 | 275 | 70  | -128.86 | 0.14 |
| P09487 | 125 | 20  | -80.54  | 0.16 | 5   | 155 | -169.47 | 0.28 | 130 | 110 | -150.29 | 0.14 |
| Q0VCU1 | 175 | 145 | -96.92  | 0.16 | 130 | 105 | -221.13 | 0.23 | 190 | 115 | -173.22 | 0.17 |

|        |     |     |         |      |     |     |         |      |     |     |         |      |
|--------|-----|-----|---------|------|-----|-----|---------|------|-----|-----|---------|------|
| P0CB32 | 335 | 130 | -105.37 | 0.04 | 350 | 25  | -250.85 | 0.16 | 210 | 35  | -138.98 | 0.16 |
| P81187 | 245 | 70  | -133.14 | 0.11 | 205 | 80  | -217.05 | 0.23 | 285 | 95  | -156.05 | 0.05 |
| Q5E9E3 | 320 | 90  | -118.62 | 0.17 | 325 | 90  | -245.41 | 0.25 | 165 | 105 | -225.58 | 0.09 |
| P26779 | 125 | 85  | -83.39  | 0.15 | 145 | 130 | -199.74 | 0.24 | 285 | 95  | -142.32 | 0.16 |
| P98140 | 125 | 115 | -96.74  | 0.12 | 125 | 130 | -201.55 | 0.03 | 270 | 155 | -153.10 | 0.12 |
| A7Z014 | 335 | 90  | -99.59  | 0.21 | 285 | 135 | -210.71 | 0.18 | 205 | 75  | -204.40 | 0.14 |
| Q58DP6 | 295 | 85  | -110.94 | 0.09 | 295 | 85  | -181.47 | 0.27 | 315 | 15  | -146.53 | 0.19 |
| Q3T083 | 140 | 165 | -69.66  | 0.20 | 140 | 40  | -156.90 | 0.28 | 70  | 95  | -164.97 | 0.11 |
| A6H6X2 | 25  | 70  | -125.48 | 0.21 | 275 | 160 | -206.30 | 0.23 | 165 | 105 | -160.78 | 0.09 |
| Q08E14 | 160 | 35  | -127.23 | 0.12 | 310 | 30  | -304.34 | 0.02 | 45  | 20  | -199.31 | 0.14 |
| P79136 | 335 | 150 | -86.64  | 0.22 | 345 | 150 | -191.12 | 0.21 | 105 | 105 | -138.56 | 0.16 |
| Q03247 | 345 | 80  | -95.99  | 0.23 | 240 | 95  | -150.76 | 0.29 | 80  | 105 | -131.54 | 0.07 |
| P35445 | 250 | 105 | -124.08 | 0.19 | 280 | 105 | -249.97 | 0.13 | 50  | 55  | -135.72 | 0.06 |
| Q769I5 | 135 | 135 | -113.75 | 0.02 | 135 | 135 | -231.96 | 0.06 | 130 | 80  | -164.30 | 0.17 |
| P04272 | 230 | 100 | -118.60 | 0.18 | 225 | 105 | -257.19 | 0.27 | 350 | 135 | -138.94 | 0.17 |
| G3MXB5 | 125 | 35  | -67.91  | 0.17 | 120 | 10  | -150.93 | 0.14 | 135 | 110 | -111.47 | 0.16 |
| G8JKW7 | 310 | 30  | -75.86  | 0.17 | 110 | 125 | -186.02 | 0.25 | 80  | 100 | -124.56 | 0.16 |
| P17453 | 260 | 120 | -107.15 | 0.10 | 270 | 115 | -216.63 | 0.16 | 150 | 55  | -107.47 | 0.15 |
| A4IFN4 | 205 | 145 | -101.98 | 0.05 | 200 | 135 | -227.64 | 0.06 | 240 | 125 | -174.72 | 0.16 |
| Q17QG2 | 150 | 125 | -114.36 | 0.17 | 150 | 125 | -274.11 | 0.26 | 150 | 125 | -180.85 | 0.14 |
| Q2KIS7 | 165 | 115 | -72.23  | 0.07 | 160 | 105 | -192.60 | 0.18 | 155 | 105 | -119.69 | 0.11 |
| F1MU34 | 195 | 130 | -136.06 | 0.15 | 55  | 60  | -230.28 | 0.18 | 270 | 115 | -184.03 | 0.05 |
| F1MGY9 | 185 | 15  | -108.37 | 0.19 | 300 | 35  | -178.25 | 0.28 | 200 | 135 | -170.01 | 0.03 |
| A5PJ69 | 270 | 155 | -108.81 | 0.13 | 265 | 30  | -192.36 | 0.22 | 345 | 80  | -139.57 | 0.19 |
| Q3SYR0 | 285 | 85  | -94.55  | 0.18 | 290 | 100 | -161.14 | 0.26 | 340 | 150 | -161.57 | 0.12 |
| Q0V7N2 | 25  | 55  | -146.09 | 0.18 | 30  | 45  | -257.73 | 0.13 | 250 | 105 | -181.47 | 0.16 |
| E1BKS1 | 350 | 135 | -80.31  | 0.21 | 345 | 135 | -173.69 | 0.33 | 135 | 135 | -201.77 | 0.01 |
| F1N430 | 15  | 110 | -61.35  | 0.16 | 95  | 30  | -164.17 | 0.21 | 340 | 45  | -184.78 | 0.09 |
| P50291 | 50  | 55  | -91.28  | 0.09 | 185 | 165 | -198.36 | 0.23 | 280 | 155 | -159.01 | 0.02 |
| G3MXK6 | 165 | 160 | -97.82  | 0.20 | 250 | 135 | -208.56 | 0.19 | 235 | 100 | -178.02 | 0.16 |
| F1N431 | 45  | 15  | -111.58 | 0.17 | 50  | 20  | -250.92 | 0.27 | 125 | 125 | -143.27 | 0.14 |
| Q58D04 | 235 | 55  | -80.32  | 0.14 | 240 | 50  | -179.17 | 0.28 | 145 | 130 | -148.06 | 0.13 |
| G3N0Q8 | 125 | 75  | -110.80 | 0.22 | 35  | 145 | -197.37 | 0.23 | 325 | 70  | -124.17 | 0.12 |
| Q3SZB0 | 70  | 95  | -108.41 | 0.16 | 70  | 95  | -198.51 | 0.27 | 295 | 85  | -176.04 | 0.05 |
| A6QR28 | 160 | 105 | -92.38  | 0.15 | 165 | 100 | -207.05 | 0.24 | 160 | 130 | -142.89 | 0.04 |
| A6QLS9 | 140 | 170 | -94.99  | 0.17 | 220 | 170 | -171.51 | 0.34 | 250 | 140 | -172.87 | 0.05 |
| Q2TBX6 | 175 | 160 | -93.67  | 0.20 | 165 | 160 | -203.11 | 0.25 | 5   | 45  | -176.56 | 0.05 |
| Q3T0L2 | 95  | 70  | -80.30  | 0.18 | 165 | 50  | -178.04 | 0.25 | 205 | 50  | -153.26 | 0.17 |
| A5D7J6 | 20  | 80  | -80.95  | 0.16 | 25  | 90  | -221.28 | 0.03 | 295 | 35  | -134.89 | 0.18 |
| F1MU18 | 10  | 110 | -103.46 | 0.11 | 40  | 160 | -221.71 | 0.07 | 60  | 10  | -95.89  | 0.01 |
| E1BFQ6 | 350 | 25  | -99.84  | 0.19 | 115 | 40  | -200.71 | 0.17 | 300 | 35  | -136.70 | 0.19 |
| F1MQF0 | 25  | 110 | -89.47  | 0.14 | 75  | 100 | -133.03 | 0.10 | 90  | 120 | -134.57 | 0.04 |
| P61223 | 305 | 65  | -93.29  | 0.20 | 330 | 35  | -180.73 | 0.26 | 150 | 20  | -210.40 | 0.03 |
| Q3MHX6 | 310 | 65  | -120.24 | 0.14 | 250 | 125 | -230.91 | 0.23 | 300 | 55  | -157.93 | 0.07 |
| F1MXJ5 | 310 | 160 | -31.63  | 0.02 | 275 | 155 | -93.69  | 0.11 | 90  | 95  | -165.57 | 0.17 |
| P79334 | 20  | 110 | -116.97 | 0.09 | 70  | 85  | -249.76 | 0.10 | 60  | 40  | -168.15 | 0.19 |

|        |     |     |         |      |     |     |         |      |     |     |         |      |
|--------|-----|-----|---------|------|-----|-----|---------|------|-----|-----|---------|------|
| Q3T074 | 330 | 115 | -108.16 | 0.21 | 335 | 120 | -176.80 | 0.33 | 250 | 25  | -124.67 | 0.17 |
| F1MJ66 | 290 | 55  | -77.77  | 0.04 | 290 | 55  | -210.68 | 0.11 | 250 | 130 | -131.42 | 0.09 |
| E1BNY3 | 225 | 40  | -85.15  | 0.15 | 260 | 60  | -181.71 | 0.01 | 280 | 100 | -147.41 | 0.11 |
| Q2KIU3 | 235 | 150 | -109.31 | 0.19 | 55  | 35  | -135.77 | 0.26 | 340 | 105 | -123.20 | 0.18 |
| F1MYN5 | 285 | 100 | -95.01  | 0.12 | 280 | 100 | -171.77 | 0.21 | 230 | 40  | -157.75 | 0.08 |
| Q58CQ9 | 210 | 95  | -83.17  | 0.15 | 255 | 130 | -188.55 | 0.27 | 260 | 160 | -194.99 | 0.14 |
| P10790 | 75  | 100 | -53.13  | 0.22 | 255 | 25  | -148.97 | 0.31 | 355 | 115 | -152.33 | 0.15 |
| A5PJT7 | 60  | 35  | -117.16 | 0.21 | 300 | 25  | -206.95 | 0.22 | 85  | 100 | -118.48 | 0.17 |
| Q9BGI2 | 265 | 40  | -111.24 | 0.23 | 265 | 35  | -174.52 | 0.33 | 315 | 40  | -191.31 | 0.13 |
| Q9BGI3 | 45  | 125 | -87.64  | 0.18 | 130 | 25  | -137.32 | 0.33 | 265 | 40  | -172.21 | 0.19 |
| P06868 | 15  | 125 | -119.71 | 0.17 | 215 | 60  | -190.41 | 0.17 | 335 | 155 | -155.67 | 0.01 |
| P26201 | 265 | 160 | -103.32 | 0.15 | 255 | 155 | -304.93 | 0.21 | 75  | 95  | -143.51 | 0.10 |
| F1MR63 | 350 | 115 | -96.40  | 0.17 | 345 | 115 | -179.53 | 0.11 | 115 | 35  | -145.10 | 0.09 |
| P84081 | 305 | 35  | -88.61  | 0.22 | 85  | 40  | -197.44 | 0.25 | 290 | 55  | -189.72 | 0.03 |
| F1MNL4 | 90  | 120 | -86.44  | 0.00 | 275 | 100 | -172.75 | 0.15 | 25  | 100 | -182.48 | 0.07 |
| Q32PH8 | 115 | 140 | -114.79 | 0.16 | 155 | 15  | -232.24 | 0.21 | 120 | 90  | -82.68  | 0.00 |
| Q58DD4 | 235 | 165 | -57.48  | 0.00 | 230 | 165 | -168.94 | 0.01 | 335 | 120 | -137.60 | 0.11 |
| P84080 | 295 | 35  | -88.57  | 0.21 | 85  | 35  | -217.29 | 0.25 | 310 | 65  | -196.01 | 0.12 |
| F1N0T3 | 205 | 50  | -110.64 | 0.19 | 65  | 55  | -215.94 | 0.24 | 165 | 50  | -144.62 | 0.05 |
| A6QNX5 | 355 | 35  | -92.22  | 0.10 | 340 | 15  | -252.99 | 0.13 | 155 | 170 | -163.36 | 0.15 |
| F1N455 | 245 | 135 | -98.56  | 0.16 | 245 | 140 | -279.93 | 0.20 | 235 | 170 | -145.65 | 0.18 |
| Q2NKV1 | 85  | 95  | -116.80 | 0.20 | 230 | 125 | -190.08 | 0.25 | 180 | 120 | -153.51 | 0.11 |
| G3MYD9 | 15  | 75  | -86.12  | 0.02 | 20  | 75  | -193.38 | 0.06 | 30  | 140 | -129.96 | 0.05 |
| F2Z4D5 | 340 | 80  | -64.38  | 0.23 | 315 | 65  | -187.14 | 0.25 | 275 | 55  | -121.08 | 0.15 |
| E1BH94 | 100 | 110 | -108.02 | 0.15 | 105 | 40  | -212.98 | 0.26 | 260 | 80  | -88.36  | 0.02 |
| Q2HJ33 | 310 | 120 | -85.47  | 0.02 | 310 | 85  | -195.74 | 0.11 | 120 | 80  | -163.19 | 0.08 |
| A1L595 | 185 | 115 | -84.08  | 0.17 | 180 | 110 | -236.41 | 0.13 | 135 | 40  | -189.28 | 0.02 |
| Q0VC36 | 220 | 15  | -97.50  | 0.15 | 220 | 15  | -185.07 | 0.31 | 60  | 60  | -180.32 | 0.15 |
| Q58D84 | 150 | 125 | -93.25  | 0.19 | 200 | 95  | -168.37 | 0.32 | 300 | 20  | -108.84 | 0.07 |
| Q5QQ49 | 295 | 125 | -121.59 | 0.09 | 65  | 155 | -208.46 | 0.10 | 300 | 130 | -163.80 | 0.16 |
| F1MJQ3 | 155 | 25  | -104.32 | 0.19 | 165 | 85  | -204.71 | 0.21 | 150 | 90  | -174.78 | 0.11 |
| P25975 | 90  | 40  | -97.20  | 0.18 | 300 | 145 | -190.81 | 0.26 | 225 | 150 | -142.72 | 0.00 |
| Q1ZYR0 | 305 | 105 | -100.01 | 0.20 | 350 | 65  | -234.62 | 0.28 | 115 | 70  | -141.81 | 0.09 |
| Q0I1H7 | 270 | 85  | -113.05 | 0.20 | 105 | 85  | -183.83 | 0.08 | 60  | 65  | -127.18 | 0.12 |
| Q3SZ16 | 295 | 80  | -109.06 | 0.21 | 220 | 20  | -239.48 | 0.14 | 230 | 20  | -181.05 | 0.12 |
| Q2KJ93 | 55  | 65  | -91.71  | 0.15 | 60  | 65  | -173.14 | 0.27 | 100 | 90  | -167.08 | 0.08 |
| G5E6G2 | 75  | 70  | -82.21  | 0.22 | 310 | 45  | -165.55 | 0.24 | 180 | 105 | -169.32 | 0.07 |
| F1MEA1 | 220 | 30  | -105.47 | 0.08 | 150 | 25  | -237.75 | 0.15 | 95  | 40  | -159.34 | 0.18 |
| Q95116 | 300 | 130 | -125.48 | 0.19 | 295 | 125 | -207.44 | 0.29 | 150 | 25  | -182.40 | 0.07 |
| G3X7F3 | 290 | 145 | -55.40  | 0.15 | 290 | 140 | -151.27 | 0.18 | 295 | 105 | -141.78 | 0.00 |
| F1N036 | 135 | 45  | -93.68  | 0.10 | 135 | 40  | -204.03 | 0.18 | 305 | 70  | -155.70 | 0.08 |
| F1MX65 | 60  | 65  | -104.31 | 0.16 | 5   | 75  | -208.34 | 0.03 | 315 | 60  | -111.10 | 0.12 |
| E1BLC6 | 25  | 125 | -70.91  | 0.05 | 225 | 150 | -162.19 | 0.04 | 60  | 155 | -169.84 | 0.02 |
| F1MW08 | 155 | 90  | -122.31 | 0.15 | 260 | 50  | -180.95 | 0.25 | 155 | 25  | -165.39 | 0.16 |
| G3MWH1 | 255 | 70  | -45.23  | 0.01 | 85  | 85  | -97.63  | 0.11 | 35  | 30  | -150.53 | 0.00 |
| E1BHY6 | 275 | 55  | -92.72  | 0.18 | 130 | 120 | -143.05 | 0.00 | 200 | 95  | -149.41 | 0.12 |

|        |     |     |         |      |     |     |         |      |     |     |         |      |
|--------|-----|-----|---------|------|-----|-----|---------|------|-----|-----|---------|------|
| A6QLB0 | 130 | 20  | -112.21 | 0.06 | 285 | 25  | -207.00 | 0.20 | 220 | 15  | -169.43 | 0.13 |
| F1MY58 | 185 | 55  | -90.78  | 0.15 | 140 | 135 | -183.37 | 0.23 | 185 | 110 | -199.35 | 0.09 |
| F1N4X7 | 315 | 70  | -97.77  | 0.22 | 70  | 45  | -204.60 | 0.26 | 310 | 85  | -182.76 | 0.02 |
| Q2KHU0 | 350 | 75  | -105.84 | 0.24 | 225 | 90  | -198.83 | 0.19 | 280 | 95  | -172.63 | 0.10 |
| Q3T0A3 | 175 | 145 | -75.51  | 0.20 | 160 | 45  | -151.52 | 0.29 | 280 | 160 | -114.75 | 0.19 |
| A6QR46 | 100 | 95  | -65.88  | 0.22 | 90  | 140 | -171.26 | 0.30 | 285 | 80  | -201.32 | 0.10 |
| E1BEZ9 | 140 | 140 | -124.48 | 0.17 | 305 | 45  | -191.40 | 0.21 | 260 | 100 | -157.87 | 0.04 |
| F1MBS0 | 245 | 80  | -99.11  | 0.19 | 185 | 140 | -176.95 | 0.21 | 295 | 60  | -138.91 | 0.15 |
| Q865V6 | 40  | 140 | -110.48 | 0.11 | 45  | 145 | -184.62 | 0.11 | 210 | 160 | -198.42 | 0.12 |
| F1MX50 | 25  | 165 | -107.38 | 0.21 | 165 | 50  | -225.72 | 0.13 | 255 | 25  | -204.24 | 0.15 |
| E1BEL6 | 340 | 50  | -88.59  | 0.10 | 330 | 35  | -171.15 | 0.16 | 220 | 100 | -177.41 | 0.11 |
| E1BEL7 | 200 | 150 | -121.90 | 0.20 | 225 | 140 | -181.54 | 0.29 | 5   | 5   | -181.01 | 0.09 |
| P34955 | 330 | 100 | -85.61  | 0.20 | 95  | 135 | -165.39 | 0.21 | 95  | 45  | -162.15 | 0.03 |
| O77588 | 5   | 10  | -104.03 | 0.19 | 0   | 5   | -218.69 | 0.29 | 290 | 55  | -170.63 | 0.05 |
| A6QLZ0 | 110 | 45  | -126.68 | 0.21 | 5   | 75  | -202.91 | 0.31 | 185 | 155 | -156.16 | 0.18 |
| Q17QL7 | 290 | 55  | -89.20  | 0.18 | 285 | 55  | -248.88 | 0.08 | 200 | 140 | -137.27 | 0.15 |
| Q1RMR4 | 130 | 175 | -69.74  | 0.21 | 335 | 20  | -155.88 | 0.27 | 240 | 80  | -154.75 | 0.16 |
| Q1RMM9 | 280 | 95  | -103.33 | 0.13 | 275 | 100 | -212.68 | 0.24 | 40  | 140 | -157.01 | 0.09 |
| E1BJN3 | 290 | 80  | -116.37 | 0.05 | 210 | 95  | -233.40 | 0.25 | 20  | 165 | -162.80 | 0.19 |
| A6QQD5 | 295 | 75  | -108.74 | 0.20 | 320 | 85  | -231.02 | 0.27 | 85  | 130 | -144.04 | 0.08 |
| F1MU12 | 185 | 110 | -118.86 | 0.09 | 175 | 105 | -226.56 | 0.02 | 180 | 60  | -156.51 | 0.08 |
| Q3MHN2 | 220 | 100 | -114.70 | 0.12 | 210 | 110 | -225.49 | 0.20 | 85  | 60  | -158.92 | 0.01 |
| O18738 | 75  | 70  | -156.33 | 0.04 | 245 | 40  | -302.49 | 0.15 | 210 | 95  | -149.95 | 0.05 |
| O18739 | 265 | 100 | -96.71  | 0.02 | 260 | 105 | -193.71 | 0.07 | 165 | 145 | -129.37 | 0.06 |
| Q0P5L5 | 230 | 105 | -94.41  | 0.20 | 235 | 105 | -186.36 | 0.30 | 90  | 140 | -123.65 | 0.15 |
| A7MB70 | 210 | 160 | -143.17 | 0.14 | 220 | 90  | -262.32 | 0.11 | 75  | 50  | -168.68 | 0.12 |
| Q3SX32 | 125 | 90  | -92.31  | 0.03 | 125 | 85  | -164.91 | 0.19 | 290 | 40  | -176.31 | 0.14 |
| A7YWH4 | 330 | 25  | -83.42  | 0.18 | 335 | 25  | -189.24 | 0.27 | 165 | 150 | -97.11  | 0.02 |
| Q5BIR5 | 90  | 115 | -95.49  | 0.20 | 85  | 115 | -244.10 | 0.27 | 175 | 70  | -193.17 | 0.08 |
| F1MAV0 | 265 | 10  | -118.19 | 0.09 | 80  | 150 | -216.33 | 0.06 | 250 | 95  | -121.25 | 0.06 |
| A5D7R6 | 245 | 100 | -124.21 | 0.13 | 160 | 115 | -202.92 | 0.25 | 280 | 150 | -119.65 | 0.19 |
| Q1RMU3 | 90  | 120 | -93.07  | 0.08 | 115 | 30  | -167.44 | 0.12 | 260 | 90  | -124.80 | 0.14 |
| P21856 | 320 | 110 | -110.56 | 0.16 | 315 | 115 | -234.42 | 0.25 | 75  | 80  | -177.21 | 0.12 |
| P08728 | 185 | 110 | -108.94 | 0.14 | 185 | 110 | -259.30 | 0.19 | 315 | 115 | -163.05 | 0.11 |
| Q17QB3 | 215 | 150 | -130.76 | 0.18 | 220 | 145 | -213.17 | 0.25 | 180 | 110 | -186.07 | 0.09 |
| E1BIY5 | 90  | 105 | -111.56 | 0.10 | 90  | 80  | -182.01 | 0.18 | 325 | 45  | -190.73 | 0.04 |
| Q29444 | 30  | 95  | -138.46 | 0.15 | 25  | 95  | -240.59 | 0.19 | 95  | 120 | -138.05 | 0.13 |
| F1N4M7 | 160 | 100 | -112.95 | 0.17 | 160 | 100 | -198.51 | 0.31 | 285 | 15  | -166.61 | 0.19 |
| P10096 | 280 | 10  | -107.45 | 0.19 | 305 | 40  | -170.23 | 0.28 | 160 | 100 | -185.96 | 0.14 |
| P31976 | 200 | 35  | -109.05 | 0.14 | 300 | 100 | -277.78 | 0.17 | 30  | 95  | -180.56 | 0.14 |
| E1BMX0 | 90  | 155 | -71.67  | 0.20 | 260 | 90  | -170.85 | 0.27 | 85  | 80  | -158.35 | 0.04 |
| Q3T0F5 | 300 | 130 | -76.45  | 0.21 | 265 | 70  | -166.44 | 0.24 | 125 | 90  | -134.99 | 0.08 |
| F1MNT5 | 265 | 100 | -49.39  | 0.02 | 185 | 80  | -125.33 | 0.24 | 265 | 35  | -175.10 | 0.07 |
| Q8MJ16 | 145 | 160 | -62.95  | 0.10 | 20  | 155 | -108.53 | 0.01 | 70  | 55  | -160.08 | 0.05 |
| Q8MHZ9 | 120 | 100 | -128.25 | 0.17 | 115 | 140 | -223.33 | 0.22 | 330 | 25  | -126.90 | 0.17 |
| P02672 | 315 | 135 | -91.26  | 0.02 | 335 | 130 | -203.95 | 0.19 | 335 | 75  | -128.78 | 0.15 |

|        |     |     |         |      |     |     |         |      |     |     |         |      |
|--------|-----|-----|---------|------|-----|-----|---------|------|-----|-----|---------|------|
| P22444 | 200 | 105 | -101.61 | 0.17 | 40  | 55  | -178.68 | 0.19 | 10  | 25  | -136.77 | 0.12 |
| F1MNM2 | 160 | 130 | -123.34 | 0.16 | 315 | 60  | -230.09 | 0.22 | 50  | 105 | -158.45 | 0.06 |
| Q2TBK6 | 245 | 70  | -104.59 | 0.20 | 220 | 55  | -159.47 | 0.28 | 75  | 125 | -150.18 | 0.09 |
| G3MYZ3 | 145 | 105 | -84.18  | 0.16 | 140 | 105 | -196.64 | 0.22 | 225 | 25  | -168.32 | 0.01 |
| E1B9F6 | 330 | 125 | -103.49 | 0.23 | 255 | 40  | -237.50 | 0.23 | 135 | 30  | -164.46 | 0.07 |
| Q3SYU2 | 200 | 75  | -101.88 | 0.13 | 200 | 70  | -200.71 | 0.21 | 200 | 40  | -140.51 | 0.16 |
| Q3ZBZ1 | 65  | 40  | -131.39 | 0.17 | 75  | 35  | -190.47 | 0.25 | 50  | 65  | -158.91 | 0.00 |
| A6QPW7 | 45  | 110 | -147.42 | 0.16 | 115 | 65  | -212.07 | 0.08 | 285 | 85  | -140.02 | 0.12 |
| F1ML02 | 200 | 80  | -67.83  | 0.04 | 185 | 75  | -134.16 | 0.21 | 270 | 125 | -159.12 | 0.18 |
| A4FUZ0 | 245 | 65  | -97.22  | 0.13 | 145 | 85  | -183.73 | 0.18 | 135 | 25  | -214.15 | 0.11 |
| A6QPW6 | 285 | 70  | -72.15  | 0.16 | 260 | 75  | -198.36 | 0.25 | 70  | 40  | -174.91 | 0.08 |
| F1MSA1 | 275 | 125 | -140.13 | 0.20 | 95  | 80  | -181.24 | 0.24 | 205 | 80  | -95.80  | 0.06 |
| Q2KIF2 | 320 | 40  | -126.98 | 0.21 | 140 | 30  | -301.95 | 0.21 | 245 | 65  | -156.52 | 0.11 |
| E1BJ49 | 285 | 85  | -103.93 | 0.15 | 155 | 125 | -215.61 | 0.13 | 260 | 75  | -146.34 | 0.07 |
| F1MKS3 | 45  | 100 | -87.01  | 0.16 | 45  | 65  | -183.41 | 0.22 | 45  | 110 | -169.10 | 0.15 |
| P80025 | 205 | 45  | -98.89  | 0.18 | 5   | 165 | -190.21 | 0.23 | 160 | 130 | -171.86 | 0.13 |
| F1MZ63 | 340 | 135 | -103.42 | 0.18 | 65  | 135 | -207.52 | 0.03 | 225 | 60  | -153.15 | 0.12 |
| Q5EA01 | 85  | 145 | -120.49 | 0.21 | 100 | 120 | -176.73 | 0.34 | 335 | 130 | -139.27 | 0.11 |
| Q3MHP2 | 340 | 20  | -74.50  | 0.20 | 335 | 75  | -140.94 | 0.32 | 250 | 70  | -143.63 | 0.04 |
| Q5EAB4 | 55  | 100 | -104.90 | 0.16 | 45  | 105 | -183.76 | 0.28 | 200 | 75  | -161.54 | 0.13 |
| Q76LV2 | 15  | 25  | -76.73  | 0.12 | 225 | 120 | -180.92 | 0.13 | 255 | 40  | -161.14 | 0.11 |
| A5D7K0 | 195 | 40  | -100.34 | 0.17 | 215 | 45  | -174.45 | 0.30 | 140 | 105 | -135.35 | 0.14 |
| E1BNR9 | 220 | 100 | -130.19 | 0.16 | 215 | 100 | -237.22 | 0.12 | 350 | 140 | -209.03 | 0.14 |
| P01888 | 80  | 15  | -99.30  | 0.23 | 305 | 35  | -153.27 | 0.27 | 150 | 80  | -176.50 | 0.14 |
| P40673 | 105 | 45  | -107.36 | 0.14 | 105 | 45  | -181.49 | 0.28 | 175 | 150 | -108.78 | 0.01 |
| F1N780 | 175 | 75  | -77.39  | 0.05 | 60  | 160 | -173.03 | 0.00 | 0   | 0   | -0.00   | 2.00 |
| F1MLW7 | 350 | 90  | -75.42  | 0.19 | 235 | 30  | -176.52 | 0.24 | 310 | 145 | -127.79 | 0.15 |
| Q08E11 | 35  | 105 | -101.23 | 0.23 | 300 | 65  | -151.21 | 0.28 | 155 | 60  | -135.04 | 0.16 |
| A6QP90 | 295 | 40  | -77.28  | 0.04 | 280 | 50  | -255.93 | 0.05 | 0   | 145 | -137.97 | 0.15 |
| Q9TR36 | 270 | 45  | -84.55  | 0.22 | 290 | 15  | -205.53 | 0.32 | 340 | 110 | -154.74 | 0.15 |
| E1BIX9 | 215 | 150 | -112.19 | 0.13 | 205 | 145 | -230.71 | 0.10 | 215 | 150 | -171.10 | 0.11 |
| Q5E997 | 70  | 50  | -72.67  | 0.18 | 355 | 155 | -174.29 | 0.22 | 280 | 20  | -147.53 | 0.20 |
| P19660 | 25  | 85  | -183.54 | 0.02 | 15  | 95  | -202.46 | 0.34 | 275 | 55  | -154.04 | 0.02 |
| P01045 | 150 | 100 | -84.04  | 0.16 | 210 | 45  | -159.99 | 0.25 | 170 | 55  | -194.78 | 0.10 |
| P19661 | 230 | 60  | -161.36 | 0.22 | 170 | 50  | -227.86 | 0.30 | 25  | 85  | -218.29 | 0.00 |
| Q3SZ01 | 270 | 115 | -95.23  | 0.17 | 0   | 145 | -185.71 | 0.22 | 120 | 30  | -125.00 | 0.17 |
| P18341 | 155 | 60  | -95.87  | 0.18 | 240 | 65  | -172.94 | 0.10 | 20  | 90  | -127.96 | 0.16 |
| Q3ZC07 | 100 | 165 | -89.30  | 0.14 | 150 | 25  | -196.30 | 0.13 | 85  | 35  | -157.48 | 0.19 |
| Q28178 | 280 | 30  | -90.29  | 0.10 | 190 | 165 | -226.87 | 0.18 | 250 | 125 | -127.66 | 0.04 |
| F1MMS7 | 255 | 105 | -117.13 | 0.13 | 350 | 140 | -251.16 | 0.30 | 220 | 100 | -225.75 | 0.13 |
| A6QNW7 | 0   | 0   | -0.00   | 2.00 | 0   | 0   | -0.00   | 2.00 | 80  | 15  | -138.56 | 0.19 |
| F1ML75 | 285 | 70  | -72.69  | 0.11 | 70  | 100 | -147.03 | 0.16 | 45  | 105 | -144.29 | 0.18 |
| Q2KHZ8 | 150 | 80  | -125.31 | 0.19 | 155 | 80  | -237.55 | 0.22 | 220 | 30  | -111.14 | 0.15 |
| Q1JPB0 | 100 | 115 | -89.60  | 0.19 | 280 | 105 | -172.14 | 0.25 | 150 | 155 | -149.91 | 0.09 |
| Q0VD27 | 210 | 165 | -83.39  | 0.22 | 195 | 170 | -186.84 | 0.24 | 55  | 30  | -104.16 | 0.19 |
| Q29RI6 | 180 | 60  | -121.00 | 0.14 | 185 | 70  | -210.25 | 0.27 | 85  | 85  | -166.77 | 0.07 |

|        |     |     |         |      |     |     |         |      |     |     |         |      |
|--------|-----|-----|---------|------|-----|-----|---------|------|-----|-----|---------|------|
| P56965 | 85  | 120 | -95.76  | 0.18 | 355 | 90  | -184.84 | 0.36 | 325 | 40  | -139.36 | 0.16 |
| O02853 | 105 | 60  | -101.38 | 0.20 | 20  | 120 | -153.35 | 0.27 | 240 | 10  | -160.32 | 0.17 |
| Q3ZCH5 | 325 | 60  | -107.88 | 0.17 | 50  | 10  | -236.44 | 0.24 | 55  | 175 | -144.88 | 0.09 |
| A6QR19 | 65  | 10  | -138.29 | 0.15 | 50  | 5   | -265.61 | 0.25 | 25  | 15  | -135.79 | 0.13 |
| E1BCJ2 | 280 | 60  | -61.18  | 0.02 | 280 | 55  | -188.38 | 0.03 | 125 | 60  | -157.21 | 0.17 |
| Q8SPJ1 | 280 | 55  | -96.11  | 0.19 | 205 | 25  | -195.81 | 0.24 | 260 | 55  | -128.17 | 0.02 |
| P01131 | 255 | 150 | -74.20  | 0.19 | 120 | 135 | -208.07 | 0.01 | 220 | 15  | -146.50 | 0.16 |
| F1N2W0 | 345 | 160 | -79.90  | 0.18 | 75  | 135 | -200.52 | 0.23 | 310 | 105 | -211.30 | 0.11 |
| P11151 | 35  | 70  | -81.87  | 0.14 | 290 | 115 | -172.47 | 0.22 | 70  | 60  | -177.57 | 0.10 |
| G5E589 | 305 | 35  | -84.97  | 0.21 | 80  | 125 | -215.80 | 0.21 | 200 | 140 | -163.95 | 0.07 |
| A4FV54 | 345 | 100 | -76.73  | 0.20 | 340 | 100 | -177.43 | 0.28 | 85  | 110 | -166.88 | 0.04 |
| E1BNJ9 | 155 | 155 | -125.37 | 0.19 | 155 | 150 | -224.06 | 0.30 | 115 | 20  | -127.11 | 0.15 |
| P19879 | 295 | 90  | -110.49 | 0.18 | 300 | 90  | -202.68 | 0.29 | 330 | 20  | -127.91 | 0.09 |
| F1N1G1 | 120 | 85  | -119.64 | 0.20 | 355 | 120 | -201.77 | 0.30 | 255 | 65  | -147.98 | 0.09 |
| A6QLI0 | 115 | 20  | -87.09  | 0.17 | 235 | 10  | -166.63 | 0.15 | 275 | 125 | -111.12 | 0.14 |
| P46446 | 325 | 15  | -88.50  | 0.16 | 330 | 20  | -176.13 | 0.27 | 130 | 130 | -132.07 | 0.00 |
| Q3B7M9 | 195 | 170 | -121.02 | 0.13 | 185 | 175 | -208.20 | 0.21 | 190 | 55  | -143.45 | 0.17 |
| P49259 | 310 | 105 | -133.40 | 0.12 | 310 | 105 | -269.78 | 0.22 | 175 | 35  | -162.70 | 0.13 |
| Q9XSC9 | 210 | 130 | -100.15 | 0.20 | 90  | 140 | -192.58 | 0.21 | 65  | 10  | -214.34 | 0.14 |
| Q0VCX4 | 95  | 65  | -98.64  | 0.10 | 90  | 65  | -228.30 | 0.20 | 280 | 60  | -121.27 | 0.03 |
| F1N726 | 330 | 5   | -63.30  | 0.14 | 245 | 115 | -154.40 | 0.17 | 235 | 90  | -164.20 | 0.16 |
| E1BNG2 | 145 | 50  | -103.49 | 0.15 | 100 | 70  | -219.62 | 0.21 | 295 | 90  | -171.25 | 0.16 |
| F1MS76 | 85  | 85  | -119.39 | 0.12 | 80  | 85  | -208.68 | 0.16 | 345 | 100 | -129.40 | 0.16 |
| P02584 | 210 | 115 | -72.32  | 0.20 | 35  | 100 | -161.20 | 0.25 | 70  | 130 | -154.84 | 0.16 |
| Q3SYU8 | 150 | 155 | -103.78 | 0.10 | 155 | 155 | -239.32 | 0.24 | 155 | 150 | -172.72 | 0.17 |
| G3N2P6 | 220 | 40  | -62.49  | 0.07 | 355 | 140 | -213.44 | 0.01 | 285 | 115 | -117.07 | 0.09 |
| F1MZI6 | 20  | 60  | -96.43  | 0.14 | 125 | 60  | -177.30 | 0.35 | 185 | 70  | -170.43 | 0.10 |
| G3NOV0 | 210 | 35  | -104.16 | 0.18 | 220 | 15  | -198.26 | 0.28 | 280 | 110 | -147.24 | 0.06 |
| A7MBI8 | 50  | 170 | -101.90 | 0.08 | 60  | 170 | -173.41 | 0.13 | 185 | 145 | -145.68 | 0.03 |
| P25326 | 20  | 15  | -103.52 | 0.16 | 235 | 55  | -191.82 | 0.21 | 15  | 110 | -170.40 | 0.16 |
| Q0PH99 | 250 | 15  | -89.98  | 0.17 | 20  | 165 | -168.06 | 0.16 | 100 | 55  | -144.91 | 0.17 |
| A6QP36 | 205 | 100 | -84.36  | 0.20 | 5   | 75  | -215.93 | 0.18 | 355 | 90  | -169.19 | 0.17 |
| Q2KJC9 | 355 | 100 | -110.01 | 0.06 | 5   | 90  | -215.77 | 0.22 | 80  | 55  | -130.53 | 0.01 |
| Q29RU4 | 60  | 80  | -94.91  | 0.05 | 65  | 55  | -219.70 | 0.07 | 80  | 75  | -128.90 | 0.18 |
| P50397 | 315 | 115 | -132.40 | 0.12 | 310 | 120 | -294.98 | 0.22 | 305 | 15  | -159.81 | 0.11 |
| Q0VD19 | 120 | 75  | -122.40 | 0.20 | 5   | 100 | -233.08 | 0.29 | 190 | 90  | -201.29 | 0.08 |
| F6S1Q0 | 295 | 55  | -117.77 | 0.15 | 310 | 50  | -227.21 | 0.24 | 350 | 5   | -147.35 | 0.17 |
| P21809 | 100 | 95  | -138.77 | 0.19 | 100 | 95  | -215.89 | 0.35 | 180 | 130 | -133.59 | 0.17 |
| F1MS00 | 70  | 75  | -63.91  | 0.04 | 270 | 75  | -161.02 | 0.01 | 270 | 140 | -140.53 | 0.17 |
| Q5E946 | 195 | 25  | -87.59  | 0.22 | 195 | 30  | -158.70 | 0.31 | 100 | 115 | -126.86 | 0.19 |
| Q5E947 | 110 | 80  | -91.22  | 0.19 | 290 | 70  | -160.88 | 0.29 | 15  | 130 | -150.39 | 0.15 |
| F1N0R8 | 120 | 135 | -120.58 | 0.21 | 15  | 115 | -190.09 | 0.27 | 80  | 125 | -162.36 | 0.01 |
| G3MXK8 | 355 | 90  | -109.49 | 0.20 | 55  | 140 | -187.61 | 0.27 | 215 | 60  | -158.65 | 0.06 |
| H9GW43 | 220 | 165 | -118.62 | 0.22 | 0   | 95  | -170.38 | 0.26 | 340 | 90  | -208.23 | 0.12 |
| G3X6Q8 | 65  | 45  | -95.99  | 0.18 | 80  | 120 | -224.87 | 0.19 | 295 | 55  | -157.84 | 0.01 |
| Q3ZBY4 | 220 | 55  | -124.33 | 0.18 | 215 | 55  | -190.18 | 0.31 | 105 | 70  | -130.27 | 0.18 |

|               |     |     |         |      |     |     |         |      |     |     |         |      |
|---------------|-----|-----|---------|------|-----|-----|---------|------|-----|-----|---------|------|
| <b>Q0P5J4</b> | 195 | 140 | -88.47  | 0.15 | 300 | 50  | -252.48 | 0.04 | 200 | 30  | -125.28 | 0.17 |
| <b>F1MBN4</b> | 340 | 90  | -144.22 | 0.15 | 340 | 90  | -202.12 | 0.29 | 70  | 75  | -124.18 | 0.04 |
| <b>Q56JW4</b> | 350 | 5   | -108.23 | 0.22 | 330 | 15  | -161.58 | 0.32 | 215 | 155 | -153.58 | 0.18 |
| <b>F1MNN7</b> | 10  | 165 | -89.02  | 0.16 | 280 | 105 | -176.23 | 0.04 | 355 | 90  | -146.63 | 0.17 |
| <b>P00741</b> | 280 | 105 | -85.16  | 0.21 | 265 | 140 | -186.43 | 0.26 | 145 | 120 | -150.00 | 0.15 |
| <b>E1B8L8</b> | 100 | 115 | -84.93  | 0.23 | 215 | 50  | -167.54 | 0.07 | 10  | 95  | -171.11 | 0.12 |
| <b>P05786</b> | 190 | 90  | -111.95 | 0.09 | 25  | 30  | -238.58 | 0.10 | 100 | 95  | -220.18 | 0.15 |
| <b>Q0VCM5</b> | 275 | 160 | -105.51 | 0.19 | 320 | 10  | -164.56 | 0.19 | 315 | 50  | -200.53 | 0.09 |
| <b>A6QNZ7</b> | 280 | 65  | -72.56  | 0.08 | 100 | 65  | -223.97 | 0.13 | 10  | 100 | -196.66 | 0.15 |
| <b>A0JNP2</b> | 60  | 170 | -82.90  | 0.22 | 225 | 155 | -124.17 | 0.31 | 65  | 50  | -148.90 | 0.00 |
| <b>G3X6G7</b> | 180 | 50  | -100.82 | 0.14 | 20  | 125 | -206.31 | 0.27 | 310 | 120 | -192.20 | 0.10 |
| <b>G3X8B1</b> | 280 | 40  | -80.17  | 0.21 | 340 | 160 | -156.19 | 0.31 | 290 | 125 | -119.24 | 0.14 |
| <b>P45478</b> | 40  | 120 | -123.31 | 0.20 | 40  | 120 | -195.40 | 0.32 | 265 | 65  | -120.46 | 0.17 |
| <b>Q3ZBZ6</b> | 245 | 55  | -95.54  | 0.02 | 20  | 110 | -172.08 | 0.05 | 325 | 110 | -202.82 | 0.12 |
| <b>Q95M17</b> | 10  | 160 | -141.84 | 0.19 | 15  | 155 | -273.55 | 0.23 | 50  | 55  | -135.83 | 0.14 |
| <b>E1BLA8</b> | 190 | 90  | -124.36 | 0.08 | 190 | 90  | -289.01 | 0.18 | 335 | 80  | -115.21 | 0.17 |
| <b>E1BD63</b> | 355 | 105 | -88.15  | 0.21 | 350 | 125 | -211.34 | 0.19 | 170 | 155 | -194.27 | 0.05 |
| <b>Q3ZCL0</b> | 100 | 45  | -77.42  | 0.13 | 100 | 160 | -201.82 | 0.17 | 305 | 55  | -163.29 | 0.15 |
| <b>E1BKK9</b> | 130 | 140 | -89.71  | 0.04 | 300 | 55  | -170.52 | 0.32 | 70  | 30  | -114.48 | 0.08 |
| <b>P00514</b> | 230 | 100 | -127.88 | 0.04 | 235 | 105 | -291.54 | 0.09 | 100 | 40  | -182.92 | 0.05 |
| <b>Q3SZZ9</b> | 95  | 115 | -63.21  | 0.10 | 195 | 135 | -168.83 | 0.01 | 320 | 35  | -107.35 | 0.03 |
| <b>P18892</b> | 320 | 50  | -79.16  | 0.18 | 170 | 60  | -239.60 | 0.23 | 190 | 25  | -111.61 | 0.15 |
| <b>Q148H6</b> | 315 | 35  | -58.70  | 0.07 | 310 | 35  | -126.00 | 0.03 | 335 | 60  | -147.39 | 0.15 |
| <b>Q148H7</b> | 100 | 45  | -97.03  | 0.16 | 100 | 40  | -257.79 | 0.16 | 30  | 110 | -141.74 | 0.09 |
| <b>F1N7D7</b> | 110 | 70  | -126.14 | 0.05 | 255 | 45  | -321.92 | 0.18 | 100 | 35  | -157.23 | 0.14 |
| <b>Q3SWW8</b> | 100 | 35  | -99.18  | 0.13 | 100 | 25  | -193.44 | 0.12 | 110 | 70  | -181.98 | 0.02 |
| <b>F1MI18</b> | 165 | 20  | -98.76  | 0.04 | 240 | 75  | -204.16 | 0.02 | 95  | 115 | -135.26 | 0.07 |
| <b>P01035</b> | 190 | 25  | -70.43  | 0.18 | 220 | 45  | -133.93 | 0.26 | 230 | 95  | -168.12 | 0.11 |
| <b>A5PJN2</b> | 335 | 60  | -85.60  | 0.18 | 55  | 45  | -211.08 | 0.22 | 300 | 55  | -146.03 | 0.14 |
| <b>F1MSA6</b> | 65  | 70  | -77.65  | 0.14 | 45  | 55  | -164.16 | 0.09 | 170 | 60  | -154.66 | 0.10 |
| <b>F1MS32</b> | 170 | 130 | -84.90  | 0.21 | 260 | 60  | -159.07 | 0.29 | 355 | 130 | -139.42 | 0.15 |
| <b>F1MUT3</b> | 330 | 105 | -127.55 | 0.14 | 325 | 110 | -253.85 | 0.24 | 190 | 90  | -208.63 | 0.07 |
| <b>F1MKS5</b> | 220 | 40  | -72.79  | 0.02 | 225 | 45  | -133.08 | 0.11 | 10  | 160 | -204.17 | 0.16 |
| <b>Q0VCU3</b> | 305 | 55  | -108.28 | 0.16 | 50  | 160 | -205.13 | 0.19 | 35  | 160 | -123.73 | 0.20 |
| <b>P31096</b> | 70  | 30  | -73.85  | 0.10 | 60  | 25  | -150.66 | 0.11 | 45  | 120 | -153.71 | 0.14 |
| <b>A1L528</b> | 280 | 160 | -74.67  | 0.21 | 300 | 60  | -166.94 | 0.21 | 245 | 60  | -139.75 | 0.10 |
| <b>Q0P569</b> | 165 | 155 | -120.65 | 0.02 | 180 | 80  | -243.68 | 0.06 | 255 | 55  | -142.23 | 0.14 |
| <b>P02070</b> | 45  | 60  | -84.93  | 0.19 | 45  | 75  | -162.71 | 0.25 | 10  | 160 | -215.21 | 0.11 |
| <b>Q9TU03</b> | 305 | 105 | -99.15  | 0.19 | 150 | 70  | -177.13 | 0.27 | 55  | 95  | -178.14 | 0.14 |
| <b>F1MK08</b> | 175 | 110 | -98.98  | 0.20 | 135 | 120 | -233.84 | 0.20 | 340 | 95  | -125.77 | 0.07 |
| <b>P42916</b> | 330 | 55  | -108.12 | 0.12 | 330 | 60  | -283.27 | 0.20 | 240 | 115 | -182.72 | 0.08 |
| <b>Q29RQ1</b> | 55  | 90  | -75.65  | 0.02 | 40  | 75  | -150.80 | 0.08 | 60  | 85  | -153.32 | 0.17 |
| <b>Q08DU4</b> | 5   | 160 | -105.63 | 0.14 | 355 | 160 | -173.87 | 0.26 | 130 | 80  | -152.02 | 0.08 |
| <b>F1MM32</b> | 170 | 95  | -115.18 | 0.09 | 170 | 95  | -214.42 | 0.19 | 220 | 100 | -170.55 | 0.06 |
| <b>P19803</b> | 175 | 65  | -80.99  | 0.15 | 40  | 100 | -180.26 | 0.19 | 175 | 25  | -161.31 | 0.17 |
| <b>F1MJ00</b> | 305 | 70  | -117.97 | 0.03 | 310 | 70  | -225.38 | 0.22 | 170 | 95  | -176.06 | 0.09 |

|        |     |     |         |      |     |     |         |      |     |     |         |      |
|--------|-----|-----|---------|------|-----|-----|---------|------|-----|-----|---------|------|
| E1BAT3 | 65  | 20  | -66.43  | 0.15 | 280 | 110 | -116.50 | 0.08 | 40  | 105 | -134.93 | 0.16 |
| F1MZJ5 | 280 | 110 | -147.88 | 0.15 | 280 | 110 | -246.12 | 0.28 | 5   | 160 | -151.77 | 0.13 |
| O77834 | 65  | 120 | -87.99  | 0.14 | 130 | 75  | -181.93 | 0.28 | 280 | 110 | -190.78 | 0.13 |
| F1MWX8 | 60  | 85  | -96.34  | 0.21 | 65  | 80  | -225.74 | 0.28 | 305 | 70  | -181.32 | 0.02 |
| E1B9H5 | 240 | 115 | -114.45 | 0.08 | 245 | 115 | -277.00 | 0.09 | 190 | 135 | -102.97 | 0.17 |
| A6QPP7 | 45  | 130 | -109.83 | 0.21 | 275 | 35  | -197.82 | 0.28 | 45  | 60  | -137.57 | 0.17 |
| E1BKZ1 | 220 | 100 | -117.37 | 0.09 | 80  | 50  | -193.72 | 0.21 | 330 | 60  | -170.57 | 0.09 |
| Q2KJJ7 | 55  | 95  | -129.55 | 0.16 | 315 | 125 | -211.23 | 0.28 | 45  | 75  | -152.76 | 0.05 |
| Q2TBL6 | 5   | 160 | -136.36 | 0.14 | 25  | 165 | -295.69 | 0.21 | 150 | 75  | -153.37 | 0.16 |
| Q08DN1 | 335 | 90  | -82.22  | 0.16 | 340 | 95  | -187.37 | 0.13 | 175 | 110 | -152.39 | 0.17 |
| Q3ZC35 | 50  | 60  | -46.90  | 0.02 | 155 | 25  | -134.57 | 0.02 | 30  | 60  | -116.14 | 0.17 |
| Q0P5D6 | 220 | 70  | -107.98 | 0.20 | 160 | 165 | -211.05 | 0.26 | 330 | 130 | -163.23 | 0.09 |
| Q2KJI3 | 270 | 80  | -92.91  | 0.12 | 125 | 85  | -191.32 | 0.11 | 345 | 95  | -157.82 | 0.05 |
| P55859 | 10  | 155 | -94.07  | 0.20 | 30  | 145 | -219.13 | 0.27 | 325 | 105 | -192.63 | 0.11 |
| Q3SZA6 | 5   | 65  | -78.84  | 0.17 | 10  | 70  | -196.14 | 0.24 | 335 | 45  | -136.20 | 0.14 |
| A6QP79 | 0   | 0   | -0.00   | 2.00 | 0   | 0   | -0.00   | 2.00 | 270 | 95  | -152.15 | 0.13 |
| F1N6D4 | 355 | 110 | -91.30  | 0.19 | 5   | 110 | -162.57 | 0.33 | 175 | 85  | -139.68 | 0.13 |
| P62833 | 165 | 70  | -82.33  | 0.19 | 170 | 70  | -166.24 | 0.31 | 255 | 50  | -173.21 | 0.05 |
| G3N2K4 | 300 | 95  | -122.97 | 0.15 | 40  | 105 | -225.45 | 0.27 | 115 | 60  | -114.07 | 0.12 |
| F1N152 | 30  | 25  | -108.16 | 0.18 | 40  | 25  | -227.74 | 0.24 | 290 | 135 | -160.16 | 0.07 |
| F1N3A1 | 20  | 25  | -113.25 | 0.11 | 25  | 10  | -250.32 | 0.20 | 80  | 105 | -117.75 | 0.17 |
| P17690 | 165 | 60  | -108.02 | 0.06 | 165 | 60  | -191.08 | 0.18 | 230 | 155 | -174.16 | 0.10 |
| G5E5C9 | 135 | 85  | -88.32  | 0.18 | 135 | 90  | -160.43 | 0.23 | 115 | 25  | -142.72 | 0.03 |
| G5E5C8 | 45  | 165 | -128.36 | 0.16 | 30  | 165 | -287.48 | 0.23 | 290 | 45  | -213.03 | 0.14 |
| O02739 | 170 | 10  | -95.16  | 0.15 | 65  | 55  | -241.19 | 0.23 | 255 | 70  | -167.90 | 0.12 |
| P41361 | 200 | 65  | -95.82  | 0.24 | 130 | 115 | -220.60 | 0.25 | 60  | 30  | -181.86 | 0.18 |
| Q3SZH5 | 220 | 125 | -107.93 | 0.09 | 315 | 20  | -196.43 | 0.29 | 50  | 80  | -173.49 | 0.15 |
| A4FUA8 | 90  | 95  | -69.29  | 0.17 | 95  | 100 | -175.31 | 0.24 | 210 | 85  | -239.41 | 0.13 |
| E1BDR2 | 290 | 45  | -153.10 | 0.16 | 290 | 45  | -267.09 | 0.30 | 215 | 165 | -159.67 | 0.16 |
| F1MUP1 | 255 | 70  | -108.07 | 0.12 | 255 | 75  | -242.10 | 0.21 | 180 | 50  | -57.47  | 0.16 |
| G3N342 | 335 | 110 | -100.02 | 0.07 | 80  | 35  | -185.54 | 0.17 | 65  | 55  | -169.12 | 0.05 |
| A5PKJ8 | 180 | 45  | -30.27  | 0.19 | 320 | 50  | -69.56  | 0.04 | 5   | 160 | -197.17 | 0.11 |
| E1BE60 | 20  | 160 | -117.78 | 0.19 | 220 | 165 | -193.87 | 0.32 | 135 | 90  | -134.91 | 0.06 |
| Q05927 | 60  | 30  | -111.20 | 0.22 | 55  | 25  | -219.71 | 0.24 | 20  | 90  | -118.34 | 0.16 |
| Q2TBT6 | 75  | 65  | -109.88 | 0.17 | 100 | 85  | -255.30 | 0.14 | 135 | 115 | -151.55 | 0.14 |
| A6QP30 | 210 | 85  | -157.56 | 0.16 | 210 | 75  | -292.45 | 0.19 | 320 | 25  | -169.97 | 0.14 |
| Q863B3 | 325 | 105 | -135.71 | 0.09 | 225 | 70  | -213.06 | 0.21 | 305 | 95  | -177.17 | 0.15 |
| F1MHQ8 | 335 | 45  | -102.49 | 0.14 | 305 | 95  | -187.89 | 0.18 | 170 | 70  | -151.33 | 0.12 |
| Q6B855 | 330 | 90  | -92.31  | 0.17 | 290 | 120 | -196.34 | 0.24 | 0   | 0   | -0.00   | 2.00 |
| Q9GKR3 | 340 | 95  | -104.42 | 0.02 | 35  | 65  | -244.73 | 0.05 | 5   | 110 | -158.90 | 0.13 |
| Q0VCX2 | 335 | 130 | -108.50 | 0.02 | 335 | 135 | -219.04 | 0.09 | 155 | 25  | -97.21  | 0.01 |
| Q0IIG8 | 30  | 65  | -72.38  | 0.19 | 35  | 65  | -158.08 | 0.23 | 305 | 55  | -154.28 | 0.06 |
| A5PJJ1 | 45  | 110 | -65.94  | 0.19 | 180 | 70  | -136.67 | 0.04 | 10  | 70  | -138.87 | 0.14 |
| F1N720 | 290 | 135 | -100.29 | 0.04 | 290 | 135 | -199.52 | 0.15 | 270 | 80  | -138.37 | 0.11 |
| F1MUY2 | 200 | 135 | -94.00  | 0.07 | 200 | 135 | -263.14 | 0.11 | 180 | 165 | -164.28 | 0.15 |
| O46375 | 220 | 100 | -72.35  | 0.21 | 205 | 90  | -139.29 | 0.28 | 280 | 35  | -154.99 | 0.01 |



|        |     |     |         |      |     |     |         |      |     |     |         |      |
|--------|-----|-----|---------|------|-----|-----|---------|------|-----|-----|---------|------|
| A7E3S8 | 200 | 50  | -90.42  | 0.12 | 255 | 50  | -238.89 | 0.18 | 25  | 20  | -184.80 | 0.09 |
| Q3MI05 | 55  | 115 | -92.61  | 0.19 | 155 | 160 | -204.44 | 0.19 | 35  | 25  | -175.98 | 0.15 |
| Q5E9F5 | 30  | 45  | -98.60  | 0.16 | 85  | 100 | -175.12 | 0.36 | 125 | 140 | -145.83 | 0.18 |
| A5D7A0 | 295 | 40  | -76.52  | 0.16 | 295 | 40  | -186.69 | 0.25 | 55  | 120 | -125.97 | 0.12 |
| F1N1D8 | 250 | 100 | -139.40 | 0.16 | 245 | 55  | -247.85 | 0.27 | 10  | 170 | -180.88 | 0.06 |
| Q3SYR8 | 115 | 135 | -75.11  | 0.21 | 115 | 130 | -117.91 | 0.22 | 25  | 155 | -130.09 | 0.06 |
| P05307 | 220 | 45  | -96.80  | 0.09 | 215 | 45  | -199.73 | 0.19 | 275 | 95  | -123.44 | 0.15 |
| G3NOX3 | 350 | 80  | -125.77 | 0.14 | 345 | 85  | -214.10 | 0.11 | 10  | 105 | -134.14 | 0.07 |
| A5PK69 | 35  | 105 | -119.85 | 0.16 | 35  | 105 | -184.43 | 0.32 | 75  | 25  | -160.91 | 0.12 |
| F1MWX3 | 140 | 95  | -115.95 | 0.20 | 125 | 105 | -238.29 | 0.26 | 260 | 30  | -171.40 | 0.12 |
| A6H713 | 75  | 95  | -117.81 | 0.22 | 80  | 85  | -200.41 | 0.18 | 135 | 40  | -132.14 | 0.18 |
| P34933 | 210 | 90  | -100.36 | 0.04 | 195 | 90  | -214.57 | 0.13 | 100 | 30  | -146.16 | 0.16 |
| E1BJS1 | 55  | 110 | -134.34 | 0.20 | 60  | 110 | -219.82 | 0.31 | 195 | 160 | -127.75 | 0.16 |
| G5E604 | 235 | 35  | -82.83  | 0.22 | 190 | 165 | -191.87 | 0.28 | 230 | 125 | -144.36 | 0.09 |
| G3N081 | 55  | 35  | -83.92  | 0.21 | 40  | 35  | -188.12 | 0.06 | 70  | 35  | -155.22 | 0.16 |
| Q3SZ45 | 355 | 140 | -81.30  | 0.20 | 205 | 55  | -182.84 | 0.27 | 310 | 120 | -176.73 | 0.04 |
| A5D7E8 | 65  | 35  | -100.80 | 0.07 | 35  | 140 | -216.78 | 0.15 | 35  | 105 | -175.93 | 0.14 |
| A2I7N0 | 115 | 120 | -89.00  | 0.18 | 110 | 120 | -195.96 | 0.23 | 350 | 85  | -194.71 | 0.13 |
| F1MWU9 | 355 | 145 | -102.48 | 0.01 | 345 | 25  | -232.57 | 0.23 | 195 | 90  | -177.29 | 0.04 |
| Q2HJD5 | 50  | 90  | -84.52  | 0.16 | 20  | 155 | -187.30 | 0.21 | 55  | 110 | -173.18 | 0.18 |
| G3N188 | 275 | 100 | -94.73  | 0.11 | 235 | 40  | -149.21 | 0.25 | 75  | 90  | -181.11 | 0.16 |
| P05689 | 5   | 170 | -96.05  | 0.08 | 25  | 170 | -248.29 | 0.22 | 125 | 105 | -159.07 | 0.14 |
| G3X6N3 | 115 | 120 | -105.50 | 0.18 | 130 | 70  | -201.24 | 0.17 | 115 | 135 | -103.65 | 0.18 |
| Q1JP75 | 30  | 65  | -82.39  | 0.16 | 125 | 60  | -163.01 | 0.25 | 250 | 95  | -217.87 | 0.14 |
| Q28034 | 110 | 55  | -97.81  | 0.04 | 80  | 20  | -212.20 | 0.10 | 85  | 100 | -168.32 | 0.17 |
| A6QPT4 | 180 | 65  | -124.54 | 0.19 | 260 | 30  | -246.68 | 0.20 | 295 | 40  | -141.95 | 0.11 |
| Q2KJ53 | 180 | 145 | -77.15  | 0.20 | 15  | 105 | -177.09 | 0.28 | 220 | 45  | -160.42 | 0.09 |
| E1BLR9 | 170 | 95  | -53.57  | 0.02 | 175 | 95  | -137.59 | 0.09 | 220 | 95  | -155.23 | 0.06 |
| Q2KIG3 | 50  | 75  | -115.94 | 0.20 | 210 | 70  | -228.06 | 0.26 | 180 | 50  | -169.12 | 0.12 |
| E1BNK3 | 90  | 60  | -107.79 | 0.16 | 245 | 70  | -178.26 | 0.16 | 170 | 150 | -150.81 | 0.02 |
| Q3MHX0 | 85  | 165 | -102.97 | 0.17 | 45  | 115 | -208.31 | 0.17 | 75  | 115 | -158.79 | 0.07 |
| F1MX87 | 55  | 30  | -100.26 | 0.10 | 60  | 35  | -224.83 | 0.20 | 30  | 85  | -113.83 | 0.17 |
| F1MLQ1 | 195 | 130 | -93.63  | 0.05 | 190 | 125 | -191.43 | 0.09 | 200 | 130 | -119.59 | 0.01 |
| O62829 | 80  | 155 | -133.26 | 0.15 | 65  | 140 | -224.52 | 0.24 | 275 | 105 | -112.94 | 0.00 |
| A6QL75 | 280 | 145 | -108.22 | 0.08 | 210 | 110 | -206.91 | 0.23 | 325 | 60  | -176.57 | 0.11 |
| F1N0F2 | 285 | 155 | -93.61  | 0.18 | 285 | 150 | -202.83 | 0.21 | 290 | 140 | -195.19 | 0.13 |
| P61585 | 135 | 60  | -79.35  | 0.18 | 140 | 55  | -168.10 | 0.25 | 60  | 45  | -236.07 | 0.09 |
| P22226 | 275 | 30  | -115.20 | 0.20 | 275 | 30  | -167.32 | 0.37 | 290 | 120 | -150.36 | 0.14 |
| Q8MJ24 | 230 | 50  | -143.42 | 0.13 | 230 | 50  | -253.10 | 0.28 | 120 | 30  | -165.74 | 0.17 |
| Q05717 | 275 | 140 | -137.72 | 0.20 | 275 | 135 | -220.84 | 0.27 | 335 | 120 | -240.28 | 0.08 |
| Q3T0L5 | 290 | 160 | -86.90  | 0.20 | 135 | 80  | -165.48 | 0.24 | 85  | 135 | -128.02 | 0.16 |
| P21214 | 150 | 55  | -108.28 | 0.16 | 25  | 45  | -287.11 | 0.20 | 20  | 120 | -145.83 | 0.09 |
| F1MW79 | 240 | 100 | -79.52  | 0.11 | 245 | 120 | -208.83 | 0.24 | 275 | 140 | -192.71 | 0.17 |
| P02662 | 65  | 40  | -140.87 | 0.20 | 60  | 40  | -277.69 | 0.30 | 130 | 45  | -113.49 | 0.16 |
| P02663 | 330 | 60  | -112.16 | 0.06 | 350 | 55  | -231.05 | 0.12 | 230 | 50  | -247.29 | 0.13 |
| F1MJ28 | 165 | 100 | -122.23 | 0.05 | 165 | 100 | -269.98 | 0.16 | 275 | 30  | -152.87 | 0.16 |

|        |     |     |         |      |     |     |         |      |     |     |         |      |
|--------|-----|-----|---------|------|-----|-----|---------|------|-----|-----|---------|------|
| P12799 | 95  | 100 | -61.17  | 0.14 | 200 | 130 | -205.09 | 0.03 | 145 | 105 | -118.97 | 0.01 |
| Q28085 | 150 | 100 | -64.92  | 0.06 | 275 | 105 | -130.09 | 0.07 | 75  | 125 | -138.85 | 0.17 |
| P55052 | 50  | 115 | -63.88  | 0.21 | 30  | 85  | -153.83 | 0.32 | 245 | 120 | -154.66 | 0.12 |
| G3MXM5 | 70  | 115 | -112.74 | 0.13 | 75  | 115 | -185.01 | 0.27 | 25  | 45  | -176.50 | 0.07 |
| Q3SYT3 | 65  | 145 | -112.06 | 0.00 | 25  | 115 | -186.69 | 0.15 | 90  | 60  | -167.75 | 0.15 |
| E1BF81 | 55  | 95  | -74.79  | 0.15 | 110 | 135 | -201.97 | 0.22 | 205 | 70  | -175.24 | 0.03 |
| Q07537 | 125 | 30  | -127.86 | 0.18 | 140 | 30  | -202.84 | 0.26 | 175 | 95  | -89.45  | 0.06 |
| E1BBY7 | 335 | 120 | -150.27 | 0.07 | 335 | 120 | -263.45 | 0.20 | 80  | 155 | -176.07 | 0.15 |
| G5E5P3 | 285 | 120 | -90.10  | 0.16 | 290 | 120 | -193.80 | 0.28 | 280 | 145 | -151.17 | 0.06 |
| E1BBP4 | 310 | 110 | -104.08 | 0.18 | 180 | 50  | -219.98 | 0.25 | 85  | 50  | -164.19 | 0.15 |
| Q27965 | 220 | 95  | -107.52 | 0.01 | 55  | 30  | -198.01 | 0.19 | 190 | 130 | -152.83 | 0.09 |
| F1ML13 | 305 | 120 | -110.46 | 0.08 | 25  | 130 | -185.85 | 0.13 | 180 | 160 | -150.73 | 0.13 |
| P80457 | 135 | 105 | -131.47 | 0.10 | 325 | 110 | -256.47 | 0.22 | 355 | 50  | -114.46 | 0.20 |
| F1N2J8 | 30  | 95  | -116.27 | 0.17 | 30  | 90  | -214.07 | 0.19 | 335 | 110 | -214.71 | 0.10 |
| F1N2J9 | 335 | 80  | -71.62  | 0.19 | 335 | 85  | -151.24 | 0.29 | 140 | 155 | -218.16 | 0.02 |
| Q2HJH2 | 205 | 120 | -95.89  | 0.19 | 295 | 60  | -155.47 | 0.21 | 165 | 110 | -234.52 | 0.02 |
| A6QQQ9 | 190 | 90  | -95.80  | 0.13 | 185 | 90  | -228.67 | 0.20 | 40  | 60  | -178.27 | 0.07 |
| F1N1Z8 | 240 | 125 | -74.01  | 0.18 | 180 | 65  | -186.88 | 0.30 | 310 | 50  | -147.95 | 0.06 |
| F1MMR6 | 100 | 75  | -109.16 | 0.21 | 110 | 80  | -198.71 | 0.23 | 150 | 75  | -213.22 | 0.15 |
| E1BFD0 | 325 | 60  | -103.48 | 0.15 | 330 | 60  | -200.49 | 0.23 | 0   | 0   | -0.00   | 2.00 |
| A5D7V3 | 185 | 120 | -78.12  | 0.19 | 45  | 40  | -200.67 | 0.24 | 315 | 20  | -147.85 | 0.10 |
| Q3T145 | 340 | 145 | -74.48  | 0.21 | 10  | 55  | -164.19 | 0.32 | 210 | 110 | -140.03 | 0.15 |
| F1MPE1 | 250 | 85  | -109.89 | 0.06 | 185 | 30  | -204.82 | 0.13 | 185 | 145 | -118.26 | 0.05 |
| Q3ZC84 | 350 | 90  | -102.05 | 0.20 | 340 | 125 | -227.84 | 0.28 | 85  | 70  | -122.39 | 0.03 |
| Q0IIA2 | 105 | 60  | -85.29  | 0.20 | 55  | 135 | -177.26 | 0.28 | 160 | 145 | -202.76 | 0.19 |
| Q3T0P6 | 85  | 135 | -103.36 | 0.18 | 190 | 80  | -199.84 | 0.19 | 185 | 70  | -141.72 | 0.18 |
| A7E350 | 0   | 0   | -0.00   | 2.00 | 0   | 0   | -0.00   | 2.00 | 305 | 115 | -126.18 | 0.18 |
| A5D7D5 | 280 | 60  | -76.36  | 0.04 | 310 | 60  | -157.96 | 0.13 | 45  | 40  | -110.26 | 0.16 |
| G3N3D4 | 145 | 75  | -154.40 | 0.13 | 160 | 70  | -217.77 | 0.24 | 325 | 65  | -151.38 | 0.15 |
| F1N5M2 | 300 | 165 | -109.93 | 0.16 | 35  | 65  | -222.26 | 0.19 | 95  | 75  | -144.66 | 0.16 |
| A6QLB7 | 160 | 150 | -179.78 | 0.23 | 60  | 100 | -185.96 | 0.38 | 240 | 135 | -128.43 | 0.17 |
| F1MFJ3 | 115 | 55  | -60.14  | 0.09 | 90  | 70  | -157.96 | 0.06 | 165 | 85  | -136.68 | 0.16 |
| P79345 | 185 | 70  | -100.71 | 0.23 | 185 | 70  | -153.93 | 0.37 | 250 | 80  | -158.61 | 0.10 |
| E1BG25 | 210 | 110 | -80.45  | 0.17 | 60  | 120 | -212.74 | 0.15 | 350 | 90  | -174.63 | 0.16 |
| F1MZ96 | 145 | 65  | -88.93  | 0.18 | 80  | 75  | -173.70 | 0.18 | 335 | 80  | -123.09 | 0.16 |
| A1A4R1 | 315 | 40  | -87.98  | 0.10 | 165 | 125 | -167.09 | 0.17 | 325 | 110 | -189.86 | 0.08 |
| A5D7M6 | 170 | 110 | -133.61 | 0.08 | 165 | 110 | -319.16 | 0.09 | 35  | 95  | -168.83 | 0.08 |
| E1BDY3 | 225 | 155 | -120.44 | 0.11 | 35  | 10  | -271.94 | 0.09 | 190 | 90  | -211.24 | 0.11 |
| F1N1W3 | 295 | 125 | -123.80 | 0.18 | 335 | 110 | -235.18 | 0.23 | 180 | 60  | -128.93 | 0.17 |
| P02754 | 135 | 25  | -70.09  | 0.21 | 160 | 25  | -168.47 | 0.25 | 205 | 120 | -140.23 | 0.15 |
| A0JND2 | 140 | 110 | -71.72  | 0.11 | 175 | 90  | -236.04 | 0.03 | 140 | 120 | -163.25 | 0.14 |
| F1MUX5 | 325 | 50  | -100.40 | 0.20 | 75  | 120 | -200.54 | 0.24 | 345 | 100 | -138.75 | 0.08 |
| G3N1H5 | 355 | 150 | -129.40 | 0.19 | 135 | 80  | -206.35 | 0.23 | 230 | 95  | -175.74 | 0.05 |
| Q3ZBD7 | 260 | 110 | -117.06 | 0.18 | 190 | 105 | -240.67 | 0.22 | 260 | 80  | -176.35 | 0.11 |
| Q5E916 | 300 | 35  | -82.37  | 0.23 | 190 | 115 | -162.74 | 0.27 | 180 | 45  | -180.44 | 0.18 |
| Q2HJ49 | 295 | 100 | -119.05 | 0.08 | 295 | 100 | -243.77 | 0.21 | 20  | 125 | -139.18 | 0.06 |

|        |     |     |         |      |     |     |         |      |     |     |         |      |
|--------|-----|-----|---------|------|-----|-----|---------|------|-----|-----|---------|------|
| Q28115 | 175 | 85  | -104.76 | 0.09 | 225 | 150 | -200.05 | 0.23 | 0   | 85  | -180.67 | 0.08 |
| P58073 | 25  | 30  | -112.90 | 0.22 | 25  | 30  | -187.12 | 0.33 | 135 | 160 | -149.02 | 0.18 |
| P02668 | 195 | 65  | -97.36  | 0.19 | 255 | 95  | -152.15 | 0.32 | 215 | 60  | -201.82 | 0.15 |
| Q2TBU0 | 265 | 30  | -77.57  | 0.07 | 265 | 30  | -173.39 | 0.17 | 330 | 110 | -192.62 | 0.15 |
| E1BE76 | 30  | 120 | -114.29 | 0.14 | 20  | 130 | -216.69 | 0.27 | 175 | 85  | -157.61 | 0.08 |
| F1MHF1 | 250 | 110 | -107.50 | 0.14 | 95  | 115 | -199.31 | 0.25 | 25  | 30  | -170.86 | 0.19 |
| P18915 | 295 | 110 | -86.26  | 0.20 | 150 | 125 | -202.90 | 0.33 | 170 | 65  | -150.77 | 0.17 |
| A6QLL8 | 220 | 60  | -133.50 | 0.22 | 220 | 60  | -189.03 | 0.38 | 250 | 110 | -158.92 | 0.12 |
| Q2KJ32 | 150 | 40  | -114.38 | 0.21 | 330 | 110 | -191.47 | 0.36 | 30  | 125 | -181.26 | 0.15 |
| Q3MHN5 | 135 | 160 | -111.77 | 0.19 | 35  | 65  | -203.05 | 0.16 | 255 | 95  | -140.57 | 0.11 |
| G3N0S9 | 350 | 60  | -101.30 | 0.13 | 230 | 95  | -223.46 | 0.15 | 260 | 35  | -121.98 | 0.10 |
| A6QLZ7 | 235 | 30  | -120.35 | 0.19 | 260 | 80  | -225.89 | 0.27 | 175 | 90  | -145.28 | 0.01 |
| P81265 | 65  | 55  | -84.42  | 0.08 | 75  | 55  | -173.12 | 0.16 | 290 | 15  | -129.55 | 0.18 |
| P00727 | 135 | 120 | -108.88 | 0.15 | 140 | 120 | -237.66 | 0.27 | 295 | 100 | -196.15 | 0.09 |
| F1MKM4 | 65  | 65  | -103.70 | 0.22 | 0   | 85  | -189.93 | 0.21 | 350 | 145 | -173.06 | 0.16 |
| A5D7C8 | 340 | 155 | -85.99  | 0.10 | 215 | 85  | -243.33 | 0.11 | 80  | 120 | -165.97 | 0.13 |
| P17248 | 180 | 45  | -133.36 | 0.22 | 95  | 90  | -197.33 | 0.23 | 250 | 115 | -163.43 | 0.10 |
| E1BF27 | 240 | 150 | -106.30 | 0.07 | 230 | 80  | -261.13 | 0.12 | 240 | 55  | -150.23 | 0.16 |
| A6QM01 | 60  | 70  | -124.10 | 0.14 | 65  | 65  | -203.06 | 0.28 | 305 | 95  | -170.89 | 0.15 |
| G3N2D7 | 55  | 105 | -80.24  | 0.20 | 240 | 105 | -148.23 | 0.27 | 350 | 125 | -191.53 | 0.10 |
| Q2KJF1 | 70  | 155 | -129.14 | 0.05 | 85  | 145 | -179.99 | 0.06 | 295 | 155 | -123.12 | 0.16 |
| Q29443 | 115 | 130 | -103.92 | 0.16 | 60  | 120 | -195.57 | 0.28 | 290 | 15  | -211.06 | 0.11 |
| E1BMJ0 | 210 | 115 | -84.56  | 0.14 | 60  | 115 | -158.81 | 0.24 | 230 | 155 | -131.47 | 0.17 |
| A5PKH0 | 205 | 80  | -76.99  | 0.20 | 25  | 50  | -151.42 | 0.10 | 355 | 170 | -186.02 | 0.15 |
| Q95LA9 | 310 | 140 | -103.50 | 0.17 | 25  | 125 | -188.36 | 0.21 | 260 | 140 | -155.05 | 0.05 |
| F1MBF6 | 295 | 70  | -88.04  | 0.08 | 20  | 55  | -163.07 | 0.30 | 265 | 150 | -130.89 | 0.02 |
| Q08D91 | 195 | 130 | -111.34 | 0.03 | 210 | 150 | -308.08 | 0.07 | 50  | 135 | -168.36 | 0.10 |
| F1N7T2 | 175 | 110 | -114.79 | 0.20 | 175 | 115 | -213.58 | 0.26 | 125 | 55  | -127.14 | 0.17 |
| Q3SYW7 | 50  | 140 | -71.27  | 0.13 | 40  | 140 | -172.31 | 0.14 | 180 | 130 | -136.27 | 0.17 |
| Q148J4 | 180 | 130 | -70.38  | 0.20 | 175 | 130 | -173.63 | 0.29 | 45  | 15  | -131.58 | 0.18 |
| F6QLM5 | 120 | 65  | -74.20  | 0.22 | 20  | 155 | -209.33 | 0.27 | 300 | 65  | -124.36 | 0.07 |
| A4IFP7 | 270 | 50  | -97.24  | 0.22 | 155 | 115 | -202.89 | 0.28 | 230 | 150 | -154.38 | 0.04 |
| P80109 | 180 | 145 | -129.19 | 0.15 | 285 | 15  | -281.27 | 0.22 | 40  | 80  | -108.05 | 0.09 |
| Q5E956 | 225 | 155 | -90.03  | 0.17 | 235 | 155 | -172.71 | 0.33 | 115 | 85  | -155.26 | 0.10 |
| A5PJE3 | 350 | 125 | -96.37  | 0.13 | 345 | 130 | -228.77 | 0.14 | 175 | 110 | -175.45 | 0.18 |
| G5E5H2 | 295 | 155 | -77.94  | 0.19 | 90  | 105 | -184.29 | 0.26 | 215 | 150 | -185.87 | 0.11 |
| A6H797 | 195 | 60  | -74.26  | 0.19 | 305 | 130 | -180.74 | 0.23 | 65  | 65  | -169.37 | 0.15 |
| Q5E9G3 | 340 | 130 | -107.74 | 0.03 | 300 | 100 | -227.21 | 0.14 | 230 | 80  | -173.96 | 0.05 |
| P13384 | 265 | 150 | -101.22 | 0.04 | 260 | 150 | -167.91 | 0.06 | 325 | 20  | -131.73 | 0.14 |
| F1N6Y1 | 50  | 135 | -109.05 | 0.09 | 205 | 90  | -217.69 | 0.17 | 75  | 155 | -147.73 | 0.11 |
| F1MLR4 | 260 | 140 | -93.27  | 0.01 | 290 | 130 | -180.96 | 0.02 | 60  | 120 | -162.30 | 0.14 |
| E1BIT9 | 240 | 55  | -105.14 | 0.22 | 345 | 170 | -319.30 | 0.21 | 220 | 25  | -126.61 | 0.18 |
